# Supplementary material for: HTE and machine learning-assisted development of iridium(i)-catalyzed selective O–H bond insertion reactions toward carboxymethyl ketones
Source: Royal Society of Chemistry journal article supplement (doi:10.1039/d2qo01954j), 2023-01-01
Supplement: d2qo01954j1.zip [file d2qo01954j1.zip]

## Sheet: model_set (412)
Well	acid	ylide	product	yield (%)
W1	O=C(O)CC1=CNC2=CC=CC=C21	O=C(C=S(C)(C)=O)C1=CC=CC=C1	O=C(OCC(C1=CC=CC=C1)=O)CC2=CNC3=CC=CC=C32	91
W2	O=C(O)CC1=CNC2=CC=C(F)C=C21	O=C(C=S(C)(C)=O)C1=CC=CC=C1	O=C(OCC(C1=CC=CC=C1)=O)CC2=CNC3=CC=C(F)C=C32	77
W3	O=C(O)CC1=CNC2=CC(Cl)=CC=C21	O=C(C=S(C)(C)=O)C1=CC=CC=C1	O=C(OCC(C1=CC=CC=C1)=O)CC2=CNC3=CC(Cl)=CC=C32	84
W4	O=C(O)CC1=CNC2=CC=C(Br)C=C21	O=C(C=S(C)(C)=O)C1=CC=CC=C1	O=C(OCC(C1=CC=CC=C1)=O)CC2=CNC3=CC=C(Br)C=C32	81
W5	O=C(O)CC1=CNC2=CC=C(OC)C=C21	O=C(C=S(C)(C)=O)C1=CC=CC=C1	O=C(OCC(C1=CC=CC=C1)=O)CC2=CNC3=CC=C(OC)C=C32	83
W6	O=C(O)CC1=C(C)NC2=CC=CC=C21	O=C(C=S(C)(C)=O)C1=CC=CC=C1	O=C(OCC(C1=CC=CC=C1)=O)CC2=C(C)NC3=CC=CC=C32	61
W7	OC(CCC1=CNC2=CC=CC=C21)=O	O=C(C=S(C)(C)=O)C1=CC=CC=C1	O=C(OCC(C1=CC=CC=C1)=O)CCC2=CNC3=CC=CC=C32	73
W8	OC(CCCC1=CNC2=CC=CC=C21)=O	O=C(C=S(C)(C)=O)C1=CC=CC=C1	O=C(OCC(C1=CC=CC=C1)=O)CCCC2=CNC3=CC=CC=C32	75
W9	OC(C1=CNC2=CC=CC=C21)=O	O=C(C=S(C)(C)=O)C1=CC=CC=C1	O=C(C1=CC=CC=C1)COC(C2=CNC3=CC=CC=C32)=O	70
W10	OC(C1=CNC2=CC=C(C)C=C21)=O	O=C(C=S(C)(C)=O)C1=CC=CC=C1	O=C(C1=CC=CC=C1)COC(C2=CNC3=CC=C(C)C=C32)=O	62
W11	OC(C1=CNC2=CC(C)=CC=C21)=O	O=C(C=S(C)(C)=O)C1=CC=CC=C1	O=C(C1=CC=CC=C1)COC(C2=CNC3=CC(C)=CC=C32)=O	64
W12	OC(C1=CNC2=C(C)C=CC=C21)=O	O=C(C=S(C)(C)=O)C1=CC=CC=C1	O=C(C1=CC=CC=C1)COC(C2=CNC3=C(C)C=CC=C32)=O	54
W13	OC(C1=CN(C)C2=CC=CC=C21)=O	O=C(C=S(C)(C)=O)C1=CC=CC=C1	O=C(C1=CC=CC=C1)COC(C2=C[N]C3=CC=CC=C32)=O	78
W14	O=C(O)C1=CC2=CC=CC=C2N1	O=C(C=S(C)(C)=O)C1=CC=CC=C1	O=C(C1=CC=CC=C1)COC(C2=CC3=CC=CC=C3N2)=O	68
W15	OC(C1=CC=C(NC=C2)C2=C1)=O	O=C(C=S(C)(C)=O)C1=CC=CC=C1	O=C(C1=CC=CC=C1)COC(C2=CC(C=CN3)=C3C=C2)=O	58
W16	OC(C1=CNC=C1)=O	O=C(C=S(C)(C)=O)C1=CC=CC=C1	O=C(C1=CC=CC=C1)COC(C2=CNC=C2)=O	45
W17	OC(C1=CC=CN=C1)=O	O=C(C=S(C)(C)=O)C1=CC=CC=C1	O=C(C1=CC=CC=C1)COC(C2=CC=CN=C2)=O	50
W18	OC(C1=CC=CN=C1C)=O	O=C(C=S(C)(C)=O)C1=CC=CC=C1	O=C(C1=CC=CC=C1)COC(C2=CC=CN=C2C)=O	61
W19	OC(C1=CC(F)=CN=C1)=O	O=C(C=S(C)(C)=O)C1=CC=CC=C1	O=C(C1=CC=CC=C1)COC(C2=CC(F)=CN=C2)=O	83
W20	OC(C1=C(Cl)C=C(Cl)N=C1)=O	O=C(C=S(C)(C)=O)C1=CC=CC=C1	O=C(C1=CC=CC=C1)COC(C2=C(Cl)C=C(Cl)N=C2)=O	87
W21	OC(C1=CC(O)=CN=C1)=O	O=C(C=S(C)(C)=O)C1=CC=CC=C1	O=C(C1=CC=CC=C1)COC(C2=CC(O)=CN=C2)=O	41
W22	OC(C1=CC=C(N)N=C1)=O	O=C(C=S(C)(C)=O)C1=CC=CC=C1	O=C(C1=CC=CC=C1)COC(C2=CC=C(N)N=C2)=O	30
W23	OC(C1=CC=CC=N1)=O	O=C(C=S(C)(C)=O)C1=CC=CC=C1	O=C(C1=CC=CC=C1)COC(C2=CC=CC=N2)=O	63
W24	OC(C1=CC=NC=C1)=O	O=C(C=S(C)(C)=O)C1=CC=CC=C1	O=C(C1=CC=CC=C1)COC(C2=CC=NC=C2)=O	89
W25	OC(C1=CN=CN=C1)=O	O=C(C=S(C)(C)=O)C1=CC=CC=C1	O=C(C1=CC=CC=C1)COC(C2=CN=CN=C2)=O	63
W26	OC(C1=CC(C=CC=C2)=C2N=C1)=O	O=C(C=S(C)(C)=O)C1=CC=CC=C1	O=C(C1=CC=CC=C1)COC(C2=CC(C=CC=C3)=C3N=C2)=O	65
W27	OC(C(C=C1)=CC2=C1OC=N2)=O	O=C(C=S(C)(C)=O)C1=CC=CC=C1	O=C(OCC(C1=CC=CC=C1)=O)C(C=C2)=CC3=C2OC=N3	81
W28	OC(C1C=C(C=CC=C2)C2O1)=O	O=C(C=S(C)(C)=O)C1=CC=CC=C1	O=C(C1=CC=CC=C1)COC(C2C=C(C=CC=C3)C3O2)=O	97
W29	OC(C1C=C(C=CC=C2)C2S1)=O	O=C(C=S(C)(C)=O)C1=CC=CC=C1	O=C(C1=CC=CC=C1)COC(C2C=C(C=CC=C3)C3S2)=O	94
W30	OC(C1=CC=C(NC)C=C1)=O	O=C(C=S(C)(C)=O)C1=CC=CC=C1	O=C(C1=CC=CC=C1)COC(C2=CC=C(NC)C=C2)=O	75
W31	OC(C1=CC=C(O)C=C1)=O	O=C(C=S(C)(C)=O)C1=CC=CC=C1	O=C(C1=CC=CC=C1)COC(C2=CC=C(O)C=C2)=O	81
W32	OCC1=CC=C(C(O)=O)C=C1	O=C(C=S(C)(C)=O)C1=CC=CC=C1	OCC1=CC=C(C(OCC(C2=CC=CC=C2)=O)=O)C=C1	96
W33	OC(C1=CC=C(C=C)C=C1)=O	O=C(C=S(C)(C)=O)C1=CC=CC=C1	O=C(C1=CC=CC=C1)COC(C2=CC=C(C=C)C=C2)=O	88
W34	OC(C1=CC=C(C#C)C=C1)=O	O=C(C=S(C)(C)=O)C1=CC=CC=C1	O=C(C1=CC=CC=C1)COC(C2=CC=C(C#C)C=C2)=O	30
W35	OC(/C=C/C1=CC=CC=C1)=O	O=C(C=S(C)(C)=O)C1=CC=CC=C1	O=C(C1=CC=CC=C1)COC(/C=C/C2=CC=CC=C2)=O	96
W36	CC(O)=O	O=C(C=S(C)(C)=O)C1=CC=CC=C1	CC(OCC(C1=CC=CC=C1)=O)=O	77
W37	OC(CCCCCCCCCO)=O	O=C(C=S(C)(C)=O)C1=CC=CC=C1	O=C(OCC(C1=CC=CC=C1)=O)CCCCCCCCCO	83
W38	O=C(O)CC1=CNC2=CC=CC=C21	O=C(C=S(C)(C)=O)C1=CC=C(C)C=C1	O=C(OCC(C1=CC=C(C)C=C1)=O)CC2=CNC3=CC=CC=C32	83
W39	O=C(O)CC1=CNC2=CC=CC=C21	O=C(C=S(C)(C)=O)C1=CC=C(OC)C=C1	O=C(OCC(C1=CC=C(OC)C=C1)=O)CC2=CNC3=CC=CC=C32	92
W40	O=C(O)CC1=CNC2=CC=CC=C21	O=C(C=S(C)(C)=O)C1=CC=C(F)C=C1	O=C(OCC(C1=CC=C(F)C=C1)=O)CC2=CNC3=CC=CC=C32	88
W41	O=C(O)CC1=CNC2=CC=CC=C21	O=C(C=S(C)(C)=O)C1=CC=C(Br)C=C1	O=C(OCC(C1=CC=C(Br)C=C1)=O)CC2=CNC3=CC=CC=C32	87
W42	O=C(O)CC1=CNC2=CC=CC=C21	O=C(C=S(C)(C)=O)C1=CC=C(I)C=C1	O=C(OCC(C1=CC=C(I)C=C1)=O)CC2=CNC3=CC=CC=C32	60
W43	O=C(O)CC1=CNC2=CC=CC=C21	O=C(C=S(C)(C)=O)C1=CC=C(C(F)(F)F)C=C1	O=C(OCC(C1=CC=C(C(F)(F)F)C=C1)=O)CC2=CNC3=CC=CC=C32	90
W44	O=C(O)CC1=CNC2=CC=CC=C21	O=C(C=S(C)(C)=O)C1=CC=C(C#N)C=C1	O=C(OCC(C1=CC=C(C#N)C=C1)=O)CC2=CNC3=CC=CC=C32	67
W45	O=C(O)CC1=CNC2=CC=CC=C21	O=C(C=S(C)(C)=O)C1=CC(C)=CC=C1	O=C(OCC(C1=CC=CC(C)=C1)=O)CC2=CNC3=CC=CC=C32	77
W46	O=C(O)CC1=CNC2=CC=CC=C21	O=C(C=S(C)(C)=O)C1=CC(F)=CC=C1	O=C(OCC(C1=CC=CC(F)=C1)=O)CC2=CNC3=CC=CC=C32	83
W47	O=C(O)CC1=CNC2=CC=CC=C21	O=C(C=S(C)(C)=O)C1=CC=C(C2=CC=CC=C2)C=C1	O=C(OCC(C1=CC=C(C2=CC=CC=C2)C=C1)=O)CC3=CNC4=CC=CC=C43	66
W48	O=C(O)CC1=CNC2=CC=CC=C21	O=C(C=S(C)(C)=O)C1=C(C=CC=C2)C2=CC=C1	O=C(OCC(C1=CC=CC2=C1C=CC=C2)=O)CC3=CNC4=CC=CC=C43	51
W49	O=C(O)CC1=CNC2=CC=CC=C21	O=C(C=S(C)(C)=O)C1=CC(C=CC=C2)=C2C=C1	O=C(OCC(C1=CC=C(C=CC=C2)C2=C1)=O)CC3=CNC4=CC=CC=C43	57
W50	O=C(O)CC1=CNC2=CC=CC=C21	O=C(C=S(C)(C)=O)C1=CC=CS1	O=C(OCC(C1=CC=CS1)=O)CC2=CNC3=CC=CC=C32	72
W51	O=C(O)CC1=CNC2=CC=CC=C21	O=C(C=S(C)(C)=O)C1=CC=CO1	O=C(OCC(C1=CC=CO1)=O)CC2=CNC3=CC=CC=C32	50
W52	O=C(O)CC1=CNC2=CC=CC=C21	O=C(C=S(C)(C)=O)/C=C/C1=CC=CC=C1	O=C(OCC(/C=C/C1=CC=CC=C1)=O)CC2=CNC3=CC=CC=C32	62
W53	O=C(O)CC1=CNC2=CC=CC=C21	O=C(C=S(C)(C)=O)C1CCCCC1	O=C(OCC(C1CCCCC1)=O)CC2=CNC3=CC=CC=C32	75
W54	O=C(O)CC1=CNC2=CC=CC=C21	O=C(C=S(C)(C)=O)CC1CCCCC1	O=C(OCC(CC1CCCCC1)=O)CC2=CNC3=CC=CC=C32	96
W55	O=C(O)CC1=CNC2=CC=CC=C21	O=C(C=S(C)(C)=O)C1CCC1	O=C(OCC(C1CCC1)=O)CC2=CNC3=CC=CC=C32	89
W56	O=C(O)CC1=CNC2=CC=CC=C21	O=C(C=S(C)(C)=O)C1C(C2=CC=CC=C2)C1	O=C(OCC(C1CC1C2=CC=CC=C2)=O)CC3=CNC4=CC=CC=C43	96
W57	O=C(O)CC1=CNC2=CC=CC=C21	O=C(C=S(C)(C)=O)OC1=CC=CC=C1	O=C(OCC(OC1=CC=CC=C1)=O)CC2=CNC3=CC=CC=C32	58
W58	O=C(O)CC1=CNC2=CC=CC=C21	O=C(C=S(C)(C)=O)OCC(C)C	O=C(OCC(OCC(C)C)=O)CC1=CNC2=CC=CC=C21	62
W59	O=C(O)CC1=CNC2=CC=CC=C21	O=C(C1=CC=CC=C1)C(C2=CC=CC=C2)=S(C)(C)=O	O=C(CC1=CNC2=CC=CC=C21)OC(C(C3=CC=CC=C3)=O)C4=CC=CC=C4	50
W60	O=C(O)CC1=CNC2=CC=CC=C21	O=C(OC)C(C1=CC=CC=C1)=S(C)(C)=O	O=C(CC1=CNC2=CC=CC=C21)OC(C(OC)=O)C3=CC=CC=C3	47
W61	BrC=1C=CC(=C(C(=O)O)C1)C	O=C(C=S(C)(C)=O)C1=CC=C(OC)C=C1	O=C(OCC(C1=CC=C(OC)C=C1)=O)C2=CC(Br)=CC=C2C	92
W62	BrC=1C=CC(=C(C(=O)O)C1)F	O=C(C=S(C)(C)=O)C1=CC=C(OC)C=C1	BrC1=CC(C(OCC(C2=CC=C(OC)C=C2)=O)=O)=C(F)C=C1	86
W63	COC=1C=C(C(=O)O)C=CC1	O=C(C=S(C)(C)=O)C1=CC=C(OC)C=C1	COC1=CC=CC(C(OCC(C2=CC=C(OC)C=C2)=O)=O)=C1	96
W64	FC1=C(C(=O)O)C=C(C=C1)C	O=C(C=S(C)(C)=O)C1=CC=C(OC)C=C1	FC1=C(C=C(C)C=C1)C(OCC(C2=CC=C(OC)C=C2)=O)=O	91
W65	CC(C1=CC=CC=C1)C(=O)O	O=C(C=S(C)(C)=O)C1=CC=C(OC)C=C1	O=C(C1=CC=C(OC)C=C1)COC(C(C2=CC=CC=C2)C)=O	96
W66	C(C1=CC=CC=C1)(=O)O	O=C(C=S(C)(C)=O)C1=CC=C(OC)C=C1	O=C(C1=CC=C(OC)C=C1)COC(C2=CC=CC=C2)=O	96
W67	C(CCC)C1=CC=C(C(=O)O)C=C1	O=C(C=S(C)(C)=O)C1=CC=C(OC)C=C1	O=C(C1=CC=C(OC)C=C1)COC(C2=CC=C(CCCC)C=C2)=O	85
W68	C(C)C1=C(C(=O)O)C=CC=C1	O=C(C=S(C)(C)=O)C1=CC=C(OC)C=C1	O=C(C1=CC=C(OC)C=C1)COC(C2=CC=CC=C2CC)=O	93
W69	BrC1=CC=C(C(=O)O)C=C1	O=C(C=S(C)(C)=O)C1=CC=C(OC)C=C1	O=C(C1=CC=C(OC)C=C1)COC(C2=CC=C(Br)C=C2)=O	95
W70	C(C)(=O)C1=CC=C(C(=O)O)C=C1	O=C(C=S(C)(C)=O)C1=CC=C(OC)C=C1	O=C(C1=CC=C(OC)C=C1)COC(C2=CC=C(C(C)=O)C=C2)=O	93
W71	FC1=C(C(=O)O)C(=CC=C1)O	O=C(C=S(C)(C)=O)C1=CC=C(OC)C=C1	O=C(C1=CC=C(OC)C=C1)COC(C2=C(O)C=CC=C2F)=O	79
W72	[N+](=O)([O-])C1=C(C(=O)O)C=CC(=C1)[N+](=O)[O-]	O=C(C=S(C)(C)=O)C1=CC=C(OC)C=C1	O=C(C1=CC=C(OC)C=C1)COC(C(C=CC([N+]([O-])=O)=C2)=C2[N+]([O-])=O)=O	42
W73	C(=O)(O)C1=C(C)C=CC(=C1)Cl	O=C(C=S(C)(C)=O)C1=CC=C(OC)C=C1	O=C(C1=CC=C(OC)C=C1)COC(C2=C(C=CC(Cl)=C2)C)=O	96
W74	FC1=C(C(=O)O)C(=CC(=C1)F)F	O=C(C=S(C)(C)=O)C1=CC=C(OC)C=C1	O=C(C1=CC=C(OC)C=C1)COC(C(C(F)=CC(F)=C2)=C2F)=O	82
W75	COC=1C=CC(=C(C(=O)O)C1)C	O=C(C=S(C)(C)=O)C1=CC=C(OC)C=C1	O=C(C1=CC=C(OC)C=C1)COC(C2=C(C)C=CC(OC)=C2)=O	95
W76	COC(C=C1)=C(C23C[C@H]4C[C@H](C[C@H](C4)C3)C2)C=C1C5=CC=C6C(C=CC(C(O)=O)=C6)=C5	O=C(C=S(C)(C)=O)C1=CC=C(OC)C=C1	O=C(C1=CC=C(OC)C=C1)COC(C2=CC(C(C=C2)=C3)=CC=C3C4=CC(C56C[C@H]7C[C@@H](C6)C[C@@H](C5)C7)=C(C=C4)OC)=O	47
W77	[N+](=O)([O-])C1=C(C(=O)O)C=CC=C1	O=C(C=S(C)(C)=O)C1=CC=C(OC)C=C1	O=C(C1=CC=C(OC)C=C1)COC(C(C=CC=C2)=C2[N+]([O-])=O)=O	78
W78	CC1=C(C(=O)O)C(=CC(=C1)C)C	O=C(C=S(C)(C)=O)C1=CC=C(OC)C=C1	O=C(C1=CC=C(OC)C=C1)COC(C(C(C)=CC(C)=C2)=C2C)=O	95
W79	CC1=C(C(=O)O)C=CC=C1	O=C(C=S(C)(C)=O)C1=CC=C(OC)C=C1	O=C(C1=CC=C(OC)C=C1)COC(C(C=CC=C2)=C2C)=O	90
W80	CC1=C(C(=O)O)C=CC=C1OC	O=C(C=S(C)(C)=O)C1=CC=C(OC)C=C1	O=C(C1=CC=C(OC)C=C1)COC(C(C=CC=C2OC)=C2C)=O	93
W81	CC1=C(C(C(=O)O)=CC=C1)O	O=C(C=S(C)(C)=O)C1=CC=C(OC)C=C1	O=C(C1=CC=C(OC)C=C1)COC(C2=CC=CC(C)=C2O)=O	70
W82	OC1=C(C=CC=C1)CC(=O)O	O=C(C=S(C)(C)=O)C1=CC=C(OC)C=C1	O=C(C1=CC=C(OC)C=C1)COC(CC(C=CC=C2)=C2O)=O	49
W83	OC=1C=C(C=CC1)CC(=O)O	O=C(C=S(C)(C)=O)C1=CC=C(OC)C=C1	O=C(C1=CC=C(OC)C=C1)COC(CC2=CC(O)=CC=C2)=O	86
W84	NC=1C(=C(C(=O)O)C=CC1)C	O=C(C=S(C)(C)=O)C1=CC=C(OC)C=C1	O=C(C1=CC=C(OC)C=C1)COC(C2=C(C)C(N)=CC=C2)=O	80
W85	[N+](=O)([O-])C1=CC=C(C=C1)CC(=O)O	O=C(C=S(C)(C)=O)C1=CC=C(OC)C=C1	O=C(C1=CC=C(OC)C=C1)COC(CC(C=C2)=CC=C2[N+]([O-])=O)=O	0
W86	OCC1=C(C(=O)O)C=CC=C1	O=C(C=S(C)(C)=O)C1=CC=C(OC)C=C1	O=C(C1=CC=C(OC)C=C1)COC(C(C=CC=C2)=C2CO)=O	89
W87	NC1=CC(=C(C(=O)O)C=C1)C	O=C(C=S(C)(C)=O)C1=CC=C(OC)C=C1	O=C(C1=CC=C(OC)C=C1)COC(C(C=C2)=C(C)C=C2N)=O	42
W88	CC1=C(C(=O)O)C=C(C=C1)[N+](=O)[O-]	O=C(C=S(C)(C)=O)C1=CC=C(OC)C=C1	O=C(C1=CC=C(OC)C=C1)COC(C(C=C([N+]([O-])=O)C=C2)=C2C)=O	85
W89	CC(C(O)=O)C1=CC=C(CC2C(CCC2)=O)C=C1	O=C(C=S(C)(C)=O)C1=CC=C(OC)C=C1	O=C(C1=CC=C(OC)C=C1)COC(C(C2=CC=C(C=C2)CC3C(CCC3)=O)C)=O	92
W90	CC=1C=C(C(=O)O)C=CC1	O=C(C=S(C)(C)=O)C1=CC=C(OC)C=C1	O=C(C1=CC=C(OC)C=C1)COC(C2=CC(C)=CC=C2)=O	92
W91	BrC=1C(=C(C)C=CC1)C(=O)O	O=C(C=S(C)(C)=O)C1=CC=C(OC)C=C1	O=C(C1=CC=C(OC)C=C1)COC(C(C(Br)=CC=C2)=C2C)=O	91
W92	C(CCC)[C@@H]1CC[C@H](CC1)C1=CC=C(C(=O)O)C=C1	O=C(C=S(C)(C)=O)C1=CC=C(OC)C=C1	O=C(C1=CC=C(OC)C=C1)COC(C(C=C2)=CC=C2[C@@H](CC3)CC[C@H]3CCCC)=O	88
W93	BrC1=C(C(=O)O)C=CC=C1	O=C(C=S(C)(C)=O)C1=CC=C(OC)C=C1	O=C(C1=CC=C(OC)C=C1)COC(C(C=CC=C2)=C2Br)=O	92
W94	O=C(O)C1=C(NC2=CC=CC(C(F)(F)F)=C2)C=CC=C1	O=C(C=S(C)(C)=O)C1=CC=C(OC)C=C1	O=C(C1=CC=C(OC)C=C1)COC(C2=C(C=CC=C2)NC3=CC=CC(C(F)(F)F)=C3)=O	85
W95	C1(=CC=CC=C1)NC=1C(C(=O)O)=CC=CC1	O=C(C=S(C)(C)=O)C1=CC=C(OC)C=C1	O=C(C1=CC=C(OC)C=C1)COC(C2=CC=CC=C2NC3=CC=CC=C3)=O	89
W96	IC1=C(C(=O)O)C=CC=C1	O=C(C=S(C)(C)=O)C1=CC=C(OC)C=C1	O=C(C1=CC=C(OC)C=C1)COC(C(C=CC=C2)=C2I)=O	83
W97	BrC1=CC=C(C=C1)CCC(=O)O	O=C(C=S(C)(C)=O)C1=CC=C(OC)C=C1	O=C(C1=CC=C(OC)C=C1)COC(CCC(C=C2)=CC=C2Br)=O	89
W98	C1(=CC=CC=C1)CCCC(=O)O	O=C(C=S(C)(C)=O)C1=CC=C(OC)C=C1	O=C(C1=CC=C(OC)C=C1)COC(CCCC2=CC=CC=C2)=O	88
W99	COC1=CC=C(C=C1)CC(=O)O	O=C(C=S(C)(C)=O)C1=CC=C(OC)C=C1	O=C(C1=CC=C(OC)C=C1)COC(CC(C=C2)=CC=C2OC)=O	91
W100	OC(CCC1=NC(C2=CC=CC=C2)=C(C3=CC=CC=C3)O1)=O	O=C(C=S(C)(C)=O)C1=CC=C(OC)C=C1	O=C(C1=CC=C(OC)C=C1)COC(CCC2=NC(C3=CC=CC=C3)=C(O2)C4=CC=CC=C4)=O	93
W101	BrC1=CC=C(O1)C(=O)O	O=C(C=S(C)(C)=O)C1=CC=C(OC)C=C1	O=C(C1=CC=C(OC)C=C1)COC(C(O2)=CC=C2Br)=O	91
W102	BrC1=CC(=NC=C1)C(=O)O	O=C(C=S(C)(C)=O)C1=CC=C(OC)C=C1	O=C(C1=CC=C(OC)C=C1)COC(C2=NC=CC(Br)=C2)=O	79
W103	ClC1=CC=CC(=N1)C(=O)O	O=C(C=S(C)(C)=O)C1=CC=C(OC)C=C1	O=C(C1=CC=C(OC)C=C1)COC(C2=NC(Cl)=CC=C2)=O	95
W104	N1=CC(=CC(=C1)C(=O)O)C(=O)O	O=C(C=S(C)(C)=O)C1=CC=C(OC)C=C1	O=C(C1=CC=C(OC)C=C1)COC(C2=CN=CC(C(OCC(C3=CC=C(OC)C=C3)=O)=O)=C2)=O	9
W105	C(C1=CC=2OCOC2C=C1)(=O)O	O=C(C=S(C)(C)=O)C1=CC=C(OC)C=C1	O=C(C1=CC=C(OC)C=C1)COC(C2=CC3=C(C=C2)OCO3)=O	90
W106	OC(CCC1=NC=CC=C1)=O	O=C(C=S(C)(C)=O)C1=CC=C(OC)C=C1	O=C(C1=CC=C(OC)C=C1)COC(CCC2=NC=CC=C2)=O	74
W107	NC1=CN=C(C=C1C(=O)O)OC	O=C(C=S(C)(C)=O)C1=CC=C(OC)C=C1	O=C(C1=CC=C(OC)C=C1)COC(C2=CC(OC)=NC=C2N)=O	15
W108	BrC1=CC=C(S1)C(=O)O	O=C(C=S(C)(C)=O)C1=CC=C(OC)C=C1	O=C(C1=CC=C(OC)C=C1)COC(C(S2)=CC=C2Br)=O	89
W109	BrC1=NC=CC(=C1)C(=O)O	O=C(C=S(C)(C)=O)C1=CC=C(OC)C=C1	O=C(C1=CC=C(OC)C=C1)COC(C2=CC(Br)=NC=C2)=O	88
W110	CC1=NC=C(C(=O)O)C=C1	O=C(C=S(C)(C)=O)C1=CC=C(OC)C=C1	O=C(C1=CC=C(OC)C=C1)COC(C(C=C2)=CN=C2C)=O	83
W111	CC1=CC=CC(=N1)C(=O)O	O=C(C=S(C)(C)=O)C1=CC=C(OC)C=C1	O=C(C1=CC=C(OC)C=C1)COC(C2=NC(C)=CC=C2)=O	92
W112	BrC1=C(C(=O)O)C=CC=N1	O=C(C=S(C)(C)=O)C1=CC=C(OC)C=C1	O=C(C1=CC=C(OC)C=C1)COC(C(C=CC=N2)=C2Br)=O	89
W113	FC(C1=NC=C(C(=O)O)C=C1)(F)F	O=C(C=S(C)(C)=O)C1=CC=C(OC)C=C1	O=C(C1=CC=C(OC)C=C1)COC(C(C=C2)=CN=C2C(F)(F)F)=O	93
W114	FC=1C=CC(=NC1)C(=O)O	O=C(C=S(C)(C)=O)C1=CC=C(OC)C=C1	O=C(C1=CC=C(OC)C=C1)COC(C2=NC=C(C=C2)F)=O	88
W115	C(C1=CC=CC=C1)(=S)O	O=C(C=S(C)(C)=O)C1=CC=C(OC)C=C1	O=C(C1=CC=C(OC)C=C1)COC(C2=CC=CC=C2)=S	75
W116	C(C=C)(=O)O	O=C(C=S(C)(C)=O)C1=CC=C(OC)C=C1	O=C(C1=CC=C(OC)C=C1)COC(C=C)=O	42
W117	C1(CCC1)C(=O)O	O=C(C=S(C)(C)=O)C1=CC=C(OC)C=C1	O=C(C1=CC=C(OC)C=C1)COC(C2CCC2)=O	81
W118	C1(CC1)CC(=O)O	O=C(C=S(C)(C)=O)C1=CC=C(OC)C=C1	O=C(C1=CC=C(OC)C=C1)COC(CC2CC2)=O	76
W119	CC(CCC(=O)O)C	O=C(C=S(C)(C)=O)C1=CC=C(OC)C=C1	O=C(C1=CC=C(OC)C=C1)COC(CCC(C)C)=O	74
W120	OC(CC[C@@H](C)[C@@H]1[C@]2(C)[C@](CC1)([H])[C@]3([H])CC[C@]4([H])C[C@H](O)CC[C@]4(C)[C@@]3([H])CC2)=O	O=C(C=S(C)(C)=O)C1=CC=C(OC)C=C1	O=C(C1=CC=C(OC)C=C1)COC(CC[C@H]([C@@H]2[C@@]3([C@]([H])([C@@]4(CC[C@@]5(C[C@@H](CC[C@@]5([C@]4(CC3)[H])C)O)[H])[H])CC2)C)C)=O	68
W121	C(CCCCC=C)(=O)O	O=C(C=S(C)(C)=O)C1=CC=C(OC)C=C1	O=C(C1=CC=C(OC)C=C1)COC(CCCCC=C)=O	74
W122	C(CCCCCCC\C=C/CCCCCCCC)(=O)O	O=C(C=S(C)(C)=O)C1=CC=C(OC)C=C1	O=C(C1=CC=C(OC)C=C1)COC(CCCCCCC/C=C\CCCCCCCC)=O	68
W123	FC(C(C(C(=O)O)(F)F)(F)F)(F)F	O=C(C=S(C)(C)=O)C1=CC=C(OC)C=C1	O=C(C1=CC=C(OC)C=C1)COC(C(F)(F)C(F)(F)C(F)(F)F)=O	6
W124	OC(CCC(C1=CC=C(C2=CC=CC=C2)C=C1)=O)=O	O=C(C=S(C)(C)=O)C1=CC=C(OC)C=C1	O=C(C1=CC=C(OC)C=C1)COC(CCC(C2=CC=C(C=C2)C3=CC=CC=C3)=O)=O	84
W125	OC([C@H](C(C)C)N(C(CCCC)=O)CC(C=C1)=CC=C1C2=CC=CC=C2C3=NNN=N3)=O	O=C(C=S(C)(C)=O)C1=CC=C(OC)C=C1	O=C(C1=CC=C(OC)C=C1)COC([C@@H](N(CC2=CC=C(C3=CC=CC=C3C4=NNN=N4)C=C2)C(CCCC)=O)C(C)C)=O	20
W126	C(C(C)C)(=O)O	O=C(C=S(C)(C)=O)C1=CC=C(OC)C=C1	O=C(C1=CC=C(OC)C=C1)COC(C(C)C)=O	91
W127	O1CCC(CC1)C(=O)O	O=C(C=S(C)(C)=O)C1=CC=C(OC)C=C1	O=C(C1=CC=C(OC)C=C1)COC(C2CCOCC2)=O	89
W128	COC(=O)[C@@H]1CC[C@H](CC1)C(=O)O	O=C(C=S(C)(C)=O)C1=CC=C(OC)C=C1	O=C(C1=CC=C(OC)C=C1)COC([C@@H](CC2)CC[C@H]2C(OC)=O)=O	91
W129	C(=O)(OCC1=CC=CC=C1)N1CCC(CC1)C(=O)O	O=C(C=S(C)(C)=O)C1=CC=C(OC)C=C1	O=C(C1=CC=C(OC)C=C1)COC(C(CC2)CCN2C(OCC3=CC=CC=C3)=O)=O	87
W130	C1(=CC=C2C=CC3=CC=CC4=CC=C1C2=C34)CCCC(=O)O	O=C(C=S(C)(C)=O)C1=CC=C(OC)C=C1	O=C(C1=CC=C(OC)C=C1)COC(CCCC2=CC=C3C=CC4=CC=CC5=CC=C2C3=C45)=O	94
W131	O=C1N(C(C2=CC=CC=C12)=O)[C@H](C(=O)O)C	O=C(C=S(C)(C)=O)C1=CC=C(OC)C=C1	O=C(C1=CC=C(OC)C=C1)COC([C@H](C)N(C(C2=CC=CC=C32)=O)C3=O)=O	93
W132	C(CCCCCC)(=O)O	O=C(C=S(C)(C)=O)C1=CC=C(OC)C=C1	O=C(C1=CC=C(OC)C=C1)COC(CCCCCC)=O	90
W133	CC(C(=O)O)(CC)C	O=C(C=S(C)(C)=O)C1=CC=C(OC)C=C1	O=C(C1=CC=C(OC)C=C1)COC(C(CC)(C)C)=O	83
W134	C(C)C(C(=O)O)CCCC	O=C(C=S(C)(C)=O)C1=CC=C(OC)C=C1	O=C(C1=CC=C(OC)C=C1)COC(C(CCCC)CC)=O	94
W135	C12C(CC(C=C1)C2)C(=O)O	O=C(C=S(C)(C)=O)C1=CC=C(OC)C=C1	O=C(C1=CC=C(OC)C=C1)COC(C2C3C=CC(C3)C2)=O	82
W136	C(CCC)(=O)O	O=C(C=S(C)(C)=O)C1=CC=C(OC)C=C1	O=C(C1=CC=C(OC)C=C1)COC(CCC)=O	93
W137	BrCCCCCCCCCCC(=O)O	O=C(C=S(C)(C)=O)C1=CC=C(OC)C=C1	O=C(C1=CC=C(OC)C=C1)COC(CCCCCCCCCCBr)=O	57
W138	ClCCC(=O)O	O=C(C=S(C)(C)=O)C1=CC=C(OC)C=C1	O=C(C1=CC=C(OC)C=C1)COC(CCCl)=O	39
W139	O=C(CCC(=O)O)C	O=C(C=S(C)(C)=O)C1=CC=C(OC)C=C1	O=C(C1=CC=C(OC)C=C1)COC(CCC(C)=O)=O	94
W140	COCC(=O)O	O=C(C=S(C)(C)=O)C1=CC=C(OC)C=C1	O=C(C1=CC=C(OC)C=C1)COC(COC)=O	92
W141	BrC=1C=CC(=C(C(=O)O)C1)C	FC1=CC=C(C(C=S(C)(C)=O)=O)C=C1	BrC1=CC(C(OCC(C2=CC=C(F)C=C2)=O)=O)=C(C)C=C1	83
W142	BrC=1C=CC(=C(C(=O)O)C1)F	FC1=CC=C(C(C=S(C)(C)=O)=O)C=C1	BrC1=CC(C(OCC(C2=CC=C(F)C=C2)=O)=O)=C(F)C=C1	78
W143	COC=1C=C(C(=O)O)C=CC1	FC1=CC=C(C(C=S(C)(C)=O)=O)C=C1	O=C(OCC(C1=CC=C(F)C=C1)=O)C2=CC=CC(OC)=C2	71
W144	FC1=C(C(=O)O)C=C(C=C1)C	FC1=CC=C(C(C=S(C)(C)=O)=O)C=C1	O=C(OCC(C1=CC=C(F)C=C1)=O)C2=C(F)C=CC(C)=C2	82
W145	CC(C1=CC=CC=C1)C(=O)O	FC1=CC=C(C(C=S(C)(C)=O)=O)C=C1	O=C(C1=CC=C(F)C=C1)COC(C(C2=CC=CC=C2)C)=O	76
W146	C(C1=CC=CC=C1)(=O)O	FC1=CC=C(C(C=S(C)(C)=O)=O)C=C1	O=C(C1=CC=C(F)C=C1)COC(C2=CC=CC=C2)=O	70
W147	C(CCC)C1=CC=C(C(=O)O)C=C1	FC1=CC=C(C(C=S(C)(C)=O)=O)C=C1	O=C(C1=CC=C(F)C=C1)COC(C(C=C2)=CC=C2CCCC)=O	72
W148	C(C)C1=C(C(=O)O)C=CC=C1	FC1=CC=C(C(C=S(C)(C)=O)=O)C=C1	O=C(C1=CC=C(F)C=C1)COC(C2=CC=CC=C2CC)=O	75
W149	BrC1=CC=C(C(=O)O)C=C1	FC1=CC=C(C(C=S(C)(C)=O)=O)C=C1	O=C(C1=CC=C(F)C=C1)COC(C2=CC=C(Br)C=C2)=O	98
W150	C(C)(=O)C1=CC=C(C(=O)O)C=C1	FC1=CC=C(C(C=S(C)(C)=O)=O)C=C1	O=C(C1=CC=C(F)C=C1)COC(C2=CC=C(C(C)=O)C=C2)=O	87
W151	FC1=C(C(=O)O)C(=CC=C1)O	FC1=CC=C(C(C=S(C)(C)=O)=O)C=C1	O=C(C1=CC=C(F)C=C1)COC(C2=C(O)C=CC=C2F)=O	81
W152	[N+](=O)([O-])C1=C(C(=O)O)C=CC(=C1)[N+](=O)[O-]	FC1=CC=C(C(C=S(C)(C)=O)=O)C=C1	O=C(C1=CC=C(F)C=C1)COC(C(C=CC([N+]([O-])=O)=C2)=C2[N+]([O-])=O)=O	47
W153	C(=O)(O)C1=C(C)C=CC(=C1)Cl	FC1=CC=C(C(C=S(C)(C)=O)=O)C=C1	O=C(C1=CC=C(F)C=C1)COC(C2=C(C=CC(Cl)=C2)C)=O	91
W154	FC1=C(C(=O)O)C(=CC(=C1)F)F	FC1=CC=C(C(C=S(C)(C)=O)=O)C=C1	O=C(C1=CC=C(F)C=C1)COC(C(C(F)=CC(F)=C2)=C2F)=O	79
W155	COC=1C=CC(=C(C(=O)O)C1)C	FC1=CC=C(C(C=S(C)(C)=O)=O)C=C1	O=C(C1=CC=C(F)C=C1)COC(C2=C(C)C=CC(OC)=C2)=O	90
W156	COC(C=C1)=C(C23C[C@H]4C[C@H](C[C@H](C4)C3)C2)C=C1C5=CC=C6C(C=CC(C(O)=O)=C6)=C5	FC1=CC=C(C(C=S(C)(C)=O)=O)C=C1	O=C(C1=CC=C(F)C=C1)COC(C2=CC(C(C=C2)=C3)=CC=C3C4=CC(C56C[C@H]7C[C@@H](C6)C[C@@H](C5)C7)=C(C=C4)OC)=O	61
W157	[N+](=O)([O-])C1=C(C(=O)O)C=CC=C1	FC1=CC=C(C(C=S(C)(C)=O)=O)C=C1	O=C(C1=CC=C(F)C=C1)COC(C(C=CC=C2)=C2[N+]([O-])=O)=O	80
W158	CC1=C(C(=O)O)C(=CC(=C1)C)C	FC1=CC=C(C(C=S(C)(C)=O)=O)C=C1	O=C(C1=CC=C(F)C=C1)COC(C(C(C)=CC(C)=C2)=C2C)=O	85
W159	CC1=C(C(=O)O)C=CC=C1	FC1=CC=C(C(C=S(C)(C)=O)=O)C=C1	O=C(C1=CC=C(F)C=C1)COC(C(C=CC=C2)=C2C)=O	88
W160	CC1=C(C(=O)O)C=CC=C1OC	FC1=CC=C(C(C=S(C)(C)=O)=O)C=C1	O=C(C1=CC=C(F)C=C1)COC(C(C=CC=C2OC)=C2C)=O	85
W161	CC1=C(C(C(=O)O)=CC=C1)O	FC1=CC=C(C(C=S(C)(C)=O)=O)C=C1	O=C(C1=CC=C(F)C=C1)COC(C(C=CC=C2C)=C2O)=O	87
W162	OC1=C(C=CC=C1)CC(=O)O	FC1=CC=C(C(C=S(C)(C)=O)=O)C=C1	O=C(C1=CC=C(F)C=C1)COC(CC(C=CC=C2)=C2O)=O	38
W163	OC=1C=C(C=CC1)CC(=O)O	FC1=CC=C(C(C=S(C)(C)=O)=O)C=C1	O=C(C1=CC=C(F)C=C1)COC(CC2=CC=CC(O)=C2)=O	67
W164	NC=1C(=C(C(=O)O)C=CC1)C	FC1=CC=C(C(C=S(C)(C)=O)=O)C=C1	O=C(C1=CC=C(F)C=C1)COC(C2=C(C)C(N)=CC=C2)=O	75
W165	[N+](=O)([O-])C1=CC=C(C=C1)CC(=O)O	FC1=CC=C(C(C=S(C)(C)=O)=O)C=C1	O=C(C1=CC=C(F)C=C1)COC(CC(C=C2)=CC=C2[N+]([O-])=O)=O	15
W166	OCC1=C(C(=O)O)C=CC=C1	FC1=CC=C(C(C=S(C)(C)=O)=O)C=C1	O=C(C1=CC=C(F)C=C1)COC(C(C=CC=C2)=C2CO)=O	93
W167	NC1=CC(=C(C(=O)O)C=C1)C	FC1=CC=C(C(C=S(C)(C)=O)=O)C=C1	O=C(C1=CC=C(F)C=C1)COC(C(C=C2)=C(C)C=C2N)=O	36
W168	CC1=C(C(=O)O)C=C(C=C1)[N+](=O)[O-]	FC1=CC=C(C(C=S(C)(C)=O)=O)C=C1	O=C(C1=CC=C(F)C=C1)COC(C(C=C([N+]([O-])=O)C=C2)=C2C)=O	85
W169	CC(C(O)=O)C1=CC=C(CC2C(CCC2)=O)C=C1	FC1=CC=C(C(C=S(C)(C)=O)=O)C=C1	O=C(C1=CC=C(F)C=C1)COC(C(C2=CC=C(C=C2)CC3C(CCC3)=O)C)=O	59
W170	CC=1C=C(C(=O)O)C=CC1	FC1=CC=C(C(C=S(C)(C)=O)=O)C=C1	O=C(C1=CC=C(F)C=C1)COC(C2=CC(C)=CC=C2)=O	75
W171	BrC=1C(=C(C)C=CC1)C(=O)O	FC1=CC=C(C(C=S(C)(C)=O)=O)C=C1	O=C(C1=CC=C(F)C=C1)COC(C2=C(C)C=CC=C2Br)=O	94
W172	C(CCC)[C@@H]1CC[C@H](CC1)C1=CC=C(C(=O)O)C=C1	FC1=CC=C(C(C=S(C)(C)=O)=O)C=C1	O=C(C1=CC=C(F)C=C1)COC(C(C=C2)=CC=C2[C@H](CC3)CC[C@@H]3CCCC)=O	69
W173	BrC1=C(C(=O)O)C=CC=C1	FC1=CC=C(C(C=S(C)(C)=O)=O)C=C1	O=C(C1=CC=C(F)C=C1)COC(C(C=CC=C2)=C2Br)=O	87
W174	O=C(O)C1=C(NC2=CC=CC(C(F)(F)F)=C2)C=CC=C1	FC1=CC=C(C(C=S(C)(C)=O)=O)C=C1	O=C(C1=CC=C(F)C=C1)COC(C2=C(C=CC=C2)NC3=CC=CC(C(F)(F)F)=C3)=O	83
W175	C1(=CC=CC=C1)NC=1C(C(=O)O)=CC=CC1	FC1=CC=C(C(C=S(C)(C)=O)=O)C=C1	O=C(C1=CC=C(F)C=C1)COC(C2=CC=CC=C2NC3=CC=CC=C3)=O	87
W176	IC1=C(C(=O)O)C=CC=C1	FC1=CC=C(C(C=S(C)(C)=O)=O)C=C1	O=C(C1=CC=C(F)C=C1)COC(C(C=CC=C2)=C2I)=O	65
W177	BrC1=CC=C(C=C1)CCC(=O)O	FC1=CC=C(C(C=S(C)(C)=O)=O)C=C1	O=C(C1=CC=C(F)C=C1)COC(CCC(C=C2)=CC=C2Br)=O	47
W178	C1(=CC=CC=C1)CCCC(=O)O	FC1=CC=C(C(C=S(C)(C)=O)=O)C=C1	O=C(C1=CC=C(F)C=C1)COC(CCCC2=CC=CC=C2)=O	45
W179	COC1=CC=C(C=C1)CC(=O)O	FC1=CC=C(C(C=S(C)(C)=O)=O)C=C1	O=C(C1=CC=C(F)C=C1)COC(CC(C=C2)=CC=C2OC)=O	44
W180	OC(CCC1=NC(C2=CC=CC=C2)=C(C3=CC=CC=C3)O1)=O	FC1=CC=C(C(C=S(C)(C)=O)=O)C=C1	O=C(C1=CC=C(F)C=C1)COC(CCC2=NC(C3=CC=CC=C3)=C(O2)C4=CC=CC=C4)=O	52
W181	BrC1=CC=C(O1)C(=O)O	FC1=CC=C(C(C=S(C)(C)=O)=O)C=C1	O=C(C1=CC=C(F)C=C1)COC(C(O2)=CC=C2Br)=O	89
W182	BrC1=CC(=NC=C1)C(=O)O	FC1=CC=C(C(C=S(C)(C)=O)=O)C=C1	O=C(C1=CC=C(F)C=C1)COC(C2=NC=CC(Br)=C2)=O	53
W183	ClC1=CC=CC(=N1)C(=O)O	FC1=CC=C(C(C=S(C)(C)=O)=O)C=C1	O=C(C1=CC=C(F)C=C1)COC(C2=NC(Cl)=CC=C2)=O	91
W184	N1=CC(=CC(=C1)C(=O)O)C(=O)O	FC1=CC=C(C(C=S(C)(C)=O)=O)C=C1	O=C(C1=CC=C(F)C=C1)COC(C2=NC(C(OCC(C3=CC=C(F)C=C3)=O)=O)=CC=C2)=O	7
W185	C(C1=CC=2OCOC2C=C1)(=O)O	FC1=CC=C(C(C=S(C)(C)=O)=O)C=C1	O=C(C1=CC=C(F)C=C1)COC(C2=CC3=C(C=C2)OCO3)=O	61
W186	OC(CCC1=NC=CC=C1)=O	FC1=CC=C(C(C=S(C)(C)=O)=O)C=C1	O=C(C1=CC=C(F)C=C1)COC(CCC2=NC=CC=C2)=O	58
W187	NC1=CN=C(C=C1C(=O)O)OC	FC1=CC=C(C(C=S(C)(C)=O)=O)C=C1	O=C(C1=CC=C(F)C=C1)COC(C2=CC(OC)=NC=C2N)=O	6
W188	BrC1=CC=C(S1)C(=O)O	FC1=CC=C(C(C=S(C)(C)=O)=O)C=C1	O=C(C1=CC=C(F)C=C1)COC(C(S2)=CC=C2Br)=O	93
W189	BrC1=NC=CC(=C1)C(=O)O	FC1=CC=C(C(C=S(C)(C)=O)=O)C=C1	O=C(C1=CC=C(F)C=C1)COC(C2=CC(Br)=NC=C2)=O	85
W190	CC1=NC=C(C(=O)O)C=C1	FC1=CC=C(C(C=S(C)(C)=O)=O)C=C1	O=C(C1=CC=C(F)C=C1)COC(C(C=C2)=CN=C2C)=O	67
W191	CC1=CC=CC(=N1)C(=O)O	FC1=CC=C(C(C=S(C)(C)=O)=O)C=C1	O=C(C1=CC=C(F)C=C1)COC(C2=NC(C)=CC=C2)=O	85
W192	BrC1=C(C(=O)O)C=CC=N1	FC1=CC=C(C(C=S(C)(C)=O)=O)C=C1	O=C(C1=CC=C(F)C=C1)COC(C(C=CC=N2)=C2Br)=O	75
W193	FC(C1=NC=C(C(=O)O)C=C1)(F)F	FC1=CC=C(C(C=S(C)(C)=O)=O)C=C1	O=C(C1=CC=C(F)C=C1)COC(C(C=C2)=CN=C2C(F)(F)F)=O	84
W194	FC=1C=CC(=NC1)C(=O)O	FC1=CC=C(C(C=S(C)(C)=O)=O)C=C1	O=C(C1=CC=C(F)C=C1)COC(C2=NC=C(C=C2)F)=O	68
W195	C(C1=CC=CC=C1)(=S)O	FC1=CC=C(C(C=S(C)(C)=O)=O)C=C1	O=C(C1=CC=C(F)C=C1)COC(C2=CC=CC=C2)=S	70
W196	C(C=C)(=O)O	FC1=CC=C(C(C=S(C)(C)=O)=O)C=C1	O=C(C1=CC=C(F)C=C1)COC(C=C)=O	12
W197	C1(CCC1)C(=O)O	FC1=CC=C(C(C=S(C)(C)=O)=O)C=C1	O=C(C1=CC=C(F)C=C1)COC(C2CCC2)=O	41
W198	C1(CC1)CC(=O)O	FC1=CC=C(C(C=S(C)(C)=O)=O)C=C1	O=C(C1=CC=C(F)C=C1)COC(CC2CC2)=O	38
W199	CC(CCC(=O)O)C	FC1=CC=C(C(C=S(C)(C)=O)=O)C=C1	O=C(C1=CC=C(F)C=C1)COC(CCC(C)C)=O	27
W200	OC(CC[C@@H](C)[C@@H]1[C@]2(C)[C@](CC1)([H])[C@]3([H])CC[C@]4([H])C[C@H](O)CC[C@]4(C)[C@@]3([H])CC2)=O	FC1=CC=C(C(C=S(C)(C)=O)=O)C=C1	O=C(C1=CC=C(F)C=C1)COC(CC[C@H]([C@@H]2[C@@]3([C@]([H])([C@@]4(CC[C@@]5(C[C@@H](CC[C@@]5([C@]4(CC3)[H])C)O)[H])[H])CC2)C)C)=O	31
W201	C(CCCCC=C)(=O)O	FC1=CC=C(C(C=S(C)(C)=O)=O)C=C1	O=C(C1=CC=C(F)C=C1)COC(CCCCC=C)=O	33
W202	C(CCCCCCC\C=C/CCCCCCCC)(=O)O	FC1=CC=C(C(C=S(C)(C)=O)=O)C=C1	O=C(C1=CC=C(F)C=C1)COC(CCCCCCC/C=C\CCCCCCCC)=O	30
W203	FC(C(C(C(=O)O)(F)F)(F)F)(F)F	FC1=CC=C(C(C=S(C)(C)=O)=O)C=C1	O=C(C1=CC=C(F)C=C1)COC(C(F)(F)C(F)(F)C(F)(F)F)=O	3
W204	OC(CCC(C1=CC=C(C2=CC=CC=C2)C=C1)=O)=O	FC1=CC=C(C(C=S(C)(C)=O)=O)C=C1	O=C(C1=CC=C(F)C=C1)COC(CCC(C2=CC=C(C=C2)C3=CC=CC=C3)=O)=O	39
W205	OC([C@H](C(C)C)N(C(CCCC)=O)CC(C=C1)=CC=C1C2=CC=CC=C2C3=NNN=N3)=O	FC1=CC=C(C(C=S(C)(C)=O)=O)C=C1	O=C(C1=CC=C(F)C=C1)COC([C@@H](N(CC2=CC=C(C3=CC=CC=C3C4=NNN=N4)C=C2)C(CCCC)=O)C(C)C)=O	12
W206	C(C(C)C)(=O)O	FC1=CC=C(C(C=S(C)(C)=O)=O)C=C1	O=C(C1=CC=C(F)C=C1)COC(C(C)C)=O	41
W207	O1CCC(CC1)C(=O)O	FC1=CC=C(C(C=S(C)(C)=O)=O)C=C1	O=C(C1=CC=C(F)C=C1)COC(C2CCOCC2)=O	69
W208	COC(=O)[C@@H]1CC[C@H](CC1)C(=O)O	FC1=CC=C(C(C=S(C)(C)=O)=O)C=C1	O=C(C1=CC=C(F)C=C1)COC([C@@H](CC2)CC[C@H]2C(OC)=O)=O	46
W209	C(=O)(OCC1=CC=CC=C1)N1CCC(CC1)C(=O)O	FC1=CC=C(C(C=S(C)(C)=O)=O)C=C1	O=C(C1=CC=C(F)C=C1)COC(C(CC2)CCN2C(OCC3=CC=CC=C3)=O)=O	57
W210	C1(=CC=C2C=CC3=CC=CC4=CC=C1C2=C34)CCCC(=O)O	FC1=CC=C(C(C=S(C)(C)=O)=O)C=C1	O=C(C1=CC=C(F)C=C1)COC(CCCC2=CC=C3C=CC4=CC=CC5=CC=C2C3=C45)=O	63
W211	O=C1N(C(C2=CC=CC=C12)=O)[C@H](C(=O)O)C	FC1=CC=C(C(C=S(C)(C)=O)=O)C=C1	O=C(C1=CC=C(F)C=C1)COC([C@H](C)N(C(C2=CC=CC=C32)=O)C3=O)=O	88
W212	C(CCCCCC)(=O)O	FC1=CC=C(C(C=S(C)(C)=O)=O)C=C1	O=C(C1=CC=C(F)C=C1)COC(CCCCCC)=O	55
W213	CC(C(=O)O)(CC)C	FC1=CC=C(C(C=S(C)(C)=O)=O)C=C1	FC1=CC=C(C=C1)C(COC(C(CC)(C)C)=O)=O	80
W214	C(C)C(C(=O)O)CCCC	FC1=CC=C(C(C=S(C)(C)=O)=O)C=C1	O=C(C1=CC=C(F)C=C1)COC(C(CCCC)CC)=O	35
W215	C12C(CC(C=C1)C2)C(=O)O	FC1=CC=C(C(C=S(C)(C)=O)=O)C=C1	O=C(C1=CC=C(F)C=C1)COC(C2C3C=CC(C3)C2)=O	42
W216	C(CCC)(=O)O	FC1=CC=C(C(C=S(C)(C)=O)=O)C=C1	O=C(C1=CC=C(F)C=C1)COC(CCC)=O	47
W217	BrCCCCCCCCCCC(=O)O	FC1=CC=C(C(C=S(C)(C)=O)=O)C=C1	O=C(C1=CC=C(F)C=C1)COC(CCCCCCCCCCBr)=O	67
W218	ClCCC(=O)O	FC1=CC=C(C(C=S(C)(C)=O)=O)C=C1	O=C(C1=CC=C(F)C=C1)COC(CCCl)=O	33
W219	O=C(CCC(=O)O)C	FC1=CC=C(C(C=S(C)(C)=O)=O)C=C1	O=C(C1=CC=C(F)C=C1)COC(CCC(C)=O)=O	56
W220	COCC(=O)O	FC1=CC=C(C(C=S(C)(C)=O)=O)C=C1	O=C(C1=CC=C(F)C=C1)COC(COC)=O	89
W221	BrC=1C=CC(=C(C(=O)O)C1)C	O=C(C=S(C)(C)=O)C1=CC(F)=CC=C1	BrC1=CC(C(OCC(C2=CC(F)=CC=C2)=O)=O)=C(C)C=C1	92
W222	BrC=1C=CC(=C(C(=O)O)C1)F	O=C(C=S(C)(C)=O)C1=CC(F)=CC=C1	BrC1=CC(C(OCC(C2=CC(F)=CC=C2)=O)=O)=C(F)C=C1	86
W223	COC=1C=C(C(=O)O)C=CC1	O=C(C=S(C)(C)=O)C1=CC(F)=CC=C1	O=C(C1=CC(F)=CC=C1)COC(C2=CC(OC)=CC=C2)=O	90
W224	FC1=C(C(=O)O)C=C(C=C1)C	O=C(C=S(C)(C)=O)C1=CC(F)=CC=C1	O=C(C1=CC(F)=CC=C1)COC(C(C=C(C)C=C2)=C2F)=O	87
W225	CC(C1=CC=CC=C1)C(=O)O	O=C(C=S(C)(C)=O)C1=CC(F)=CC=C1	O=C(C1=CC(F)=CC=C1)COC(C(C2=CC=CC=C2)C)=O	93
W226	C(C1=CC=CC=C1)(=O)O	O=C(C=S(C)(C)=O)C1=CC(F)=CC=C1	O=C(C1=CC(F)=CC=C1)COC(C2=CC=CC=C2)=O	91
W227	C(CCC)C1=CC=C(C(=O)O)C=C1	O=C(C=S(C)(C)=O)C1=CC(F)=CC=C1	O=C(C1=CC(F)=CC=C1)COC(C(C=C2)=CC=C2CCCC)=O	87
W228	C(C)C1=C(C(=O)O)C=CC=C1	O=C(C=S(C)(C)=O)C1=CC(F)=CC=C1	O=C(C1=CC(F)=CC=C1)COC(C2=CC=CC=C2CC)=O	95
W229	BrC1=CC=C(C(=O)O)C=C1	O=C(C=S(C)(C)=O)C1=CC(F)=CC=C1	O=C(C1=CC(F)=CC=C1)COC(C2=CC=C(Br)C=C2)=O	93
W230	C(C)(=O)C1=CC=C(C(=O)O)C=C1	O=C(C=S(C)(C)=O)C1=CC(F)=CC=C1	O=C(C1=CC(F)=CC=C1)COC(C2=CC=C(C(C)=O)C=C2)=O	92
W231	FC1=C(C(=O)O)C(=CC=C1)O	O=C(C=S(C)(C)=O)C1=CC(F)=CC=C1	O=C(C1=CC(F)=CC=C1)COC(C(C(O)=CC=C2)=C2F)=O	75
W232	[N+](=O)([O-])C1=C(C(=O)O)C=CC(=C1)[N+](=O)[O-]	O=C(C=S(C)(C)=O)C1=CC(F)=CC=C1	O=C(C1=CC(F)=CC=C1)COC(C(C=CC([N+]([O-])=O)=C2)=C2[N+]([O-])=O)=O	45
W233	C(=O)(O)C1=C(C)C=CC(=C1)Cl	O=C(C=S(C)(C)=O)C1=CC(F)=CC=C1	O=C(C1=CC(F)=CC=C1)COC(C2=C(C=CC(Cl)=C2)C)=O	95
W234	FC1=C(C(=O)O)C(=CC(=C1)F)F	O=C(C=S(C)(C)=O)C1=CC(F)=CC=C1	O=C(C1=CC(F)=CC=C1)COC(C(C(F)=CC(F)=C2)=C2F)=O	75
W235	COC=1C=CC(=C(C(=O)O)C1)C	O=C(C=S(C)(C)=O)C1=CC(F)=CC=C1	O=C(C1=CC(F)=CC=C1)COC(C2=C(C)C=CC(OC)=C2)=O	93
W236	COC(C=C1)=C(C23C[C@H]4C[C@H](C[C@H](C4)C3)C2)C=C1C5=CC=C6C(C=CC(C(O)=O)=C6)=C5	O=C(C=S(C)(C)=O)C1=CC(F)=CC=C1	O=C(C1=CC(F)=CC=C1)COC(C2=CC(C(C=C2)=C3)=CC=C3C4=CC(C56C[C@H]7C[C@@H](C6)C[C@@H](C5)C7)=C(C=C4)OC)=O	55
W237	[N+](=O)([O-])C1=C(C(=O)O)C=CC=C1	O=C(C=S(C)(C)=O)C1=CC(F)=CC=C1	O=C(C1=CC(F)=CC=C1)COC(C(C=CC=C2)=C2[N+]([O-])=O)=O	85
W238	CC1=C(C(=O)O)C(=CC(=C1)C)C	O=C(C=S(C)(C)=O)C1=CC(F)=CC=C1	O=C(C1=CC(F)=CC=C1)COC(C(C(C)=CC(C)=C2)=C2C)=O	78
W239	CC1=C(C(=O)O)C=CC=C1	O=C(C=S(C)(C)=O)C1=CC(F)=CC=C1	O=C(C1=CC(F)=CC=C1)COC(C(C=CC=C2)=C2C)=O	88
W240	CC1=C(C(=O)O)C=CC=C1OC	O=C(C=S(C)(C)=O)C1=CC(F)=CC=C1	O=C(C1=CC(F)=CC=C1)COC(C(C=CC=C2OC)=C2C)=O	91
W241	CC1=C(C(C(=O)O)=CC=C1)O	O=C(C=S(C)(C)=O)C1=CC(F)=CC=C1	O=C(C1=CC(F)=CC=C1)COC(C(C=CC=C2C)=C2O)=O	84
W242	OC1=C(C=CC=C1)CC(=O)O	O=C(C=S(C)(C)=O)C1=CC(F)=CC=C1	O=C(C1=CC(F)=CC=C1)COC(CC(C=CC=C2)=C2O)=O	33
W243	OC=1C=C(C=CC1)CC(=O)O	O=C(C=S(C)(C)=O)C1=CC(F)=CC=C1	O=C(C1=CC(F)=CC=C1)COC(CC2=CC=CC(O)=C2)=O	73
W244	NC=1C(=C(C(=O)O)C=CC1)C	O=C(C=S(C)(C)=O)C1=CC(F)=CC=C1	O=C(C1=CC(F)=CC=C1)COC(C2=C(C)C(N)=CC=C2)=O	78
W245	[N+](=O)([O-])C1=CC=C(C=C1)CC(=O)O	O=C(C=S(C)(C)=O)C1=CC(F)=CC=C1	O=C(C1=CC(F)=CC=C1)COC(CC(C=C2)=CC=C2[N+]([O-])=O)=O	8
W246	OCC1=C(C(=O)O)C=CC=C1	O=C(C=S(C)(C)=O)C1=CC(F)=CC=C1	O=C(C1=CC(F)=CC=C1)COC(C(C=CC=C2)=C2CO)=O	89
W247	NC1=CC(=C(C(=O)O)C=C1)C	O=C(C=S(C)(C)=O)C1=CC(F)=CC=C1	O=C(C1=CC(F)=CC=C1)COC(C(C=C2)=C(C)C=C2N)=O	48
W248	CC1=C(C(=O)O)C=C(C=C1)[N+](=O)[O-]	O=C(C=S(C)(C)=O)C1=CC(F)=CC=C1	O=C(C1=CC(F)=CC=C1)COC(C(C=C([N+]([O-])=O)C=C2)=C2C)=O	86
W249	CC(C(O)=O)C1=CC=C(CC2C(CCC2)=O)C=C1	O=C(C=S(C)(C)=O)C1=CC(F)=CC=C1	O=C(C1=CC(F)=CC=C1)COC(C(C2=CC=C(C=C2)CC3C(CCC3)=O)C)=O	91
W250	CC=1C=C(C(=O)O)C=CC1	O=C(C=S(C)(C)=O)C1=CC(F)=CC=C1	O=C(C1=CC(F)=CC=C1)COC(C2=CC(C)=CC=C2)=O	76
W251	BrC=1C(=C(C)C=CC1)C(=O)O	O=C(C=S(C)(C)=O)C1=CC(F)=CC=C1	O=C(C1=CC(F)=CC=C1)COC(C(C(Br)=CC=C2)=C2C)=O	92
W252	C(CCC)[C@@H]1CC[C@H](CC1)C1=CC=C(C(=O)O)C=C1	O=C(C=S(C)(C)=O)C1=CC(F)=CC=C1	O=C(C1=CC(F)=CC=C1)COC(C(C=C2)=CC=C2[C@@H](CC3)CC[C@H]3CCCC)=O	91
W253	BrC1=C(C(=O)O)C=CC=C1	O=C(C=S(C)(C)=O)C1=CC(F)=CC=C1	O=C(C1=CC=CC(F)=C1)COC(C(C=CC=C2)=C2Br)=O	93
W254	O=C(O)C1=C(NC2=CC=CC(C(F)(F)F)=C2)C=CC=C1	O=C(C=S(C)(C)=O)C1=CC(F)=CC=C1	O=C(C1=CC=CC(F)=C1)COC(C2=C(C=CC=C2)NC3=CC=CC(C(F)(F)F)=C3)=O	94
W255	C1(=CC=CC=C1)NC=1C(C(=O)O)=CC=CC1	O=C(C=S(C)(C)=O)C1=CC(F)=CC=C1	O=C(C1=CC=CC(F)=C1)COC(C2=CC=CC=C2NC3=CC=CC=C3)=O	88
W256	IC1=C(C(=O)O)C=CC=C1	O=C(C=S(C)(C)=O)C1=CC(F)=CC=C1	O=C(C1=CC=CC(F)=C1)COC(C(C=CC=C2)=C2I)=O	82
W257	BrC1=CC=C(C=C1)CCC(=O)O	O=C(C=S(C)(C)=O)C1=CC(F)=CC=C1	O=C(C1=CC=CC(F)=C1)COC(CCC(C=C2)=CC=C2Br)=O	92
W258	C1(=CC=CC=C1)CCCC(=O)O	O=C(C=S(C)(C)=O)C1=CC(F)=CC=C1	O=C(C1=CC=CC(F)=C1)COC(CCCC2=CC=CC=C2)=O	65
W259	COC1=CC=C(C=C1)CC(=O)O	O=C(C=S(C)(C)=O)C1=CC(F)=CC=C1	O=C(C1=CC=CC(F)=C1)COC(CC(C=C2)=CC=C2OC)=O	84
W260	OC(CCC1=NC(C2=CC=CC=C2)=C(C3=CC=CC=C3)O1)=O	O=C(C=S(C)(C)=O)C1=CC(F)=CC=C1	O=C(C1=CC=CC(F)=C1)COC(CCC2=NC(C3=CC=CC=C3)=C(O2)C4=CC=CC=C4)=O	89
W261	BrC1=CC=C(O1)C(=O)O	O=C(C=S(C)(C)=O)C1=CC(F)=CC=C1	O=C(C1=CC(F)=CC=C1)COC(C(O2)=CC=C2Br)=O	93
W262	BrC1=CC(=NC=C1)C(=O)O	O=C(C=S(C)(C)=O)C1=CC(F)=CC=C1	O=C(C1=CC(F)=CC=C1)COC(C2=NC=CC(Br)=C2)=O	75
W263	ClC1=CC=CC(=N1)C(=O)O	O=C(C=S(C)(C)=O)C1=CC(F)=CC=C1	O=C(C1=CC(F)=CC=C1)COC(C2=NC(Cl)=CC=C2)=O	96
W264	N1=CC(=CC(=C1)C(=O)O)C(=O)O	O=C(C=S(C)(C)=O)C1=CC(F)=CC=C1	O=C(C1=CC(F)=CC=C1)COC(C2=CC(C(OCC(C3=CC(F)=CC=C3)=O)=O)=CN=C2)=O	9
W265	C(C1=CC=2OCOC2C=C1)(=O)O	O=C(C=S(C)(C)=O)C1=CC(F)=CC=C1	O=C(C1=CC(F)=CC=C1)COC(C2=CC3=C(C=C2)OCO3)=O	95
W266	OC(CCC1=NC=CC=C1)=O	O=C(C=S(C)(C)=O)C1=CC(F)=CC=C1	O=C(C1=CC(F)=CC=C1)COC(CCC2=NC=CC=C2)=O	70
W267	NC1=CN=C(C=C1C(=O)O)OC	O=C(C=S(C)(C)=O)C1=CC(F)=CC=C1	O=C(C1=CC(F)=CC=C1)COC(C2=CC(OC)=NC=C2N)=O	7
W268	BrC1=CC=C(S1)C(=O)O	O=C(C=S(C)(C)=O)C1=CC(F)=CC=C1	O=C(C1=CC(F)=CC=C1)COC(C(S2)=CC=C2Br)=O	91
W269	BrC1=NC=CC(=C1)C(=O)O	O=C(C=S(C)(C)=O)C1=CC(F)=CC=C1	O=C(C1=CC=CC(F)=C1)COC(C2=CC(Br)=NC=C2)=O	93
W270	CC1=NC=C(C(=O)O)C=C1	O=C(C=S(C)(C)=O)C1=CC(F)=CC=C1	O=C(C1=CC=CC(F)=C1)COC(C(C=C2)=CN=C2C)=O	91
W271	CC1=CC=CC(=N1)C(=O)O	O=C(C=S(C)(C)=O)C1=CC(F)=CC=C1	O=C(C1=CC=CC(F)=C1)COC(C2=NC(C)=CC=C2)=O	92
W272	BrC1=C(C(=O)O)C=CC=N1	O=C(C=S(C)(C)=O)C1=CC(F)=CC=C1	O=C(C1=CC=CC(F)=C1)COC(C(C=CC=N2)=C2Br)=O	91
W273	FC(C1=NC=C(C(=O)O)C=C1)(F)F	O=C(C=S(C)(C)=O)C1=CC(F)=CC=C1	O=C(C1=CC=CC(F)=C1)COC(C(C=C2)=CN=C2C(F)(F)F)=O	92
W274	FC=1C=CC(=NC1)C(=O)O	O=C(C=S(C)(C)=O)C1=CC(F)=CC=C1	O=C(C1=CC=CC(F)=C1)COC(C2=NC=C(C=C2)F)=O	92
W275	C(C1=CC=CC=C1)(=S)O	O=C(C=S(C)(C)=O)C1=CC(F)=CC=C1	O=C(C1=CC=CC(F)=C1)COC(C2=CC=CC=C2)=S	51
W276	C(C=C)(=O)O	O=C(C=S(C)(C)=O)C1=CC(F)=CC=C1	O=C(C1=CC=CC(F)=C1)COC(C=C)=O	28
W277	C1(CCC1)C(=O)O	O=C(C=S(C)(C)=O)C1=CC(F)=CC=C1	O=C(C1=CC(F)=CC=C1)COC(C2CCC2)=O	87
W278	C1(CC1)CC(=O)O	O=C(C=S(C)(C)=O)C1=CC(F)=CC=C1	O=C(C1=CC(F)=CC=C1)COC(CC2CC2)=O	66
W279	CC(CCC(=O)O)C	O=C(C=S(C)(C)=O)C1=CC(F)=CC=C1	O=C(C1=CC(F)=CC=C1)COC(CCC(C)C)=O	58
W280	OC(CC[C@@H](C)[C@@H]1[C@]2(C)[C@](CC1)([H])[C@]3([H])CC[C@]4([H])C[C@H](O)CC[C@]4(C)[C@@]3([H])CC2)=O	O=C(C=S(C)(C)=O)C1=CC(F)=CC=C1	O=C(C1=CC(F)=CC=C1)COC(CC[C@H]([C@@H]2[C@@]3([C@]([H])([C@@]4(CC[C@@]5(C[C@@H](CC[C@@]5([C@]4(CC3)[H])C)O)[H])[H])CC2)C)C)=O	52
W281	C(CCCCC=C)(=O)O	O=C(C=S(C)(C)=O)C1=CC(F)=CC=C1	O=C(C1=CC(F)=CC=C1)COC(CCCCC=C)=O	34
W282	C(CCCCCCC\C=C/CCCCCCCC)(=O)O	O=C(C=S(C)(C)=O)C1=CC(F)=CC=C1	O=C(C1=CC(F)=CC=C1)COC(CCCCCCC/C=C\CCCCCCCC)=O	47
W283	FC(C(C(C(=O)O)(F)F)(F)F)(F)F	O=C(C=S(C)(C)=O)C1=CC(F)=CC=C1	O=C(C1=CC(F)=CC=C1)COC(C(F)(F)C(F)(F)C(F)(F)F)=O	2
W284	OC(CCC(C1=CC=C(C2=CC=CC=C2)C=C1)=O)=O	O=C(C=S(C)(C)=O)C1=CC(F)=CC=C1	O=C(C1=CC(F)=CC=C1)COC(CCC(C2=CC=C(C=C2)C3=CC=CC=C3)=O)=O	85
W285	OC([C@H](C(C)C)N(C(CCCC)=O)CC(C=C1)=CC=C1C2=CC=CC=C2C3=NNN=N3)=O	O=C(C=S(C)(C)=O)C1=CC(F)=CC=C1	O=C(C1=CC(F)=CC=C1)COC([C@@H](N(CC2=CC=C(C3=CC=CC=C3C4=NNN=N4)C=C2)C(CCCC)=O)C(C)C)=O	12
W286	C(C(C)C)(=O)O	O=C(C=S(C)(C)=O)C1=CC(F)=CC=C1	O=C(C1=CC(F)=CC=C1)COC(C(C)C)=O	84
W287	O1CCC(CC1)C(=O)O	O=C(C=S(C)(C)=O)C1=CC(F)=CC=C1	O=C(C1=CC(F)=CC=C1)COC(C2CCOCC2)=O	82
W288	COC(=O)[C@@H]1CC[C@H](CC1)C(=O)O	O=C(C=S(C)(C)=O)C1=CC(F)=CC=C1	O=C(C1=CC(F)=CC=C1)COC([C@@H](CC2)CC[C@H]2C(OC)=O)=O	87
W289	C(=O)(OCC1=CC=CC=C1)N1CCC(CC1)C(=O)O	O=C(C=S(C)(C)=O)C1=CC(F)=CC=C1	O=C(C1=CC(F)=CC=C1)COC(C(CC2)CCN2C(OCC3=CC=CC=C3)=O)=O	88
W290	C1(=CC=C2C=CC3=CC=CC4=CC=C1C2=C34)CCCC(=O)O	O=C(C=S(C)(C)=O)C1=CC(F)=CC=C1	O=C(C1=CC(F)=CC=C1)COC(CCCC2=CC=C3C=CC4=CC=CC5=CC=C2C3=C45)=O	85
W291	O=C1N(C(C2=CC=CC=C12)=O)[C@H](C(=O)O)C	O=C(C=S(C)(C)=O)C1=CC(F)=CC=C1	O=C(C1=CC(F)=CC=C1)COC([C@H](C)N(C(C2=CC=CC=C32)=O)C3=O)=O	87
W292	C(CCCCCC)(=O)O	O=C(C=S(C)(C)=O)C1=CC(F)=CC=C1	O=C(C1=CC(F)=CC=C1)COC(CCCCCC)=O	89
W293	CC(C(=O)O)(CC)C	O=C(C=S(C)(C)=O)C1=CC(F)=CC=C1	O=C(C1=CC=CC(F)=C1)COC(C(CC)(C)C)=O	78
W294	C(C)C(C(=O)O)CCCC	O=C(C=S(C)(C)=O)C1=CC(F)=CC=C1	O=C(C1=CC(F)=CC=C1)COC(C(CCCC)CC)=O	81
W295	C12C(CC(C=C1)C2)C(=O)O	O=C(C=S(C)(C)=O)C1=CC(F)=CC=C1	O=C(C1=CC(F)=CC=C1)COC(C2C3C=CC(C3)C2)=O	74
W296	C(CCC)(=O)O	O=C(C=S(C)(C)=O)C1=CC(F)=CC=C1	O=C(C1=CC(F)=CC=C1)COC(CCC)=O	87
W297	BrCCCCCCCCCCC(=O)O	O=C(C=S(C)(C)=O)C1=CC(F)=CC=C1	O=C(C1=CC(F)=CC=C1)COC(CCCCCCCCCCBr)=O	77
W298	ClCCC(=O)O	O=C(C=S(C)(C)=O)C1=CC(F)=CC=C1	ClCCC(OCC(C1=CC(F)=CC=C1)=O)=O	41
W299	O=C(CCC(=O)O)C	O=C(C=S(C)(C)=O)C1=CC(F)=CC=C1	O=C(C1=CC(F)=CC=C1)COC(CCC(C)=O)=O	93
W300	COCC(=O)O	O=C(C=S(C)(C)=O)C1=CC(F)=CC=C1	O=C(C1=CC(F)=CC=C1)COC(COC)=O	87
W301	BrC1=C(C(=O)O)C=CC=C1	O=C(C=S(C)(C)=O)C1=CC=C(C(F)(F)F)C=C1	O=C(C1=CC=C(C(F)(F)F)C=C1)COC(C(C=CC=C2)=C2Br)=O	91
W302	O=C(O)C1=C(NC2=CC=CC(C(F)(F)F)=C2)C=CC=C1	O=C(C=S(C)(C)=O)C1=CC=C(C(F)(F)F)C=C1	O=C(C1=CC=C(C(F)(F)F)C=C1)COC(C2=C(C=CC=C2)NC3=CC=CC(C(F)(F)F)=C3)=O	85
W303	C1(=CC=CC=C1)NC=1C(C(=O)O)=CC=CC1	O=C(C=S(C)(C)=O)C1=CC=C(C(F)(F)F)C=C1	O=C(C1=CC=C(C(F)(F)F)C=C1)COC(C2=CC=CC=C2NC3=CC=CC=C3)=O	89
W304	IC1=C(C(=O)O)C=CC=C1	O=C(C=S(C)(C)=O)C1=CC=C(C(F)(F)F)C=C1	O=C(C1=CC=C(C(F)(F)F)C=C1)COC(C(C=CC=C2)=C2I)=O	85
W305	BrC1=CC=C(C=C1)CCC(=O)O	O=C(C=S(C)(C)=O)C1=CC=C(C(F)(F)F)C=C1	O=C(C1=CC=C(C(F)(F)F)C=C1)COC(CCC(C=C2)=CC=C2Br)=O	89
W306	C1(=CC=CC=C1)CCCC(=O)O	O=C(C=S(C)(C)=O)C1=CC=C(C(F)(F)F)C=C1	O=C(C1=CC=C(C(F)(F)F)C=C1)COC(CCCC2=CC=CC=C2)=O	70
W307	COC1=CC=C(C=C1)CC(=O)O	O=C(C=S(C)(C)=O)C1=CC=C(C(F)(F)F)C=C1	O=C(C1=CC=C(C(F)(F)F)C=C1)COC(CC(C=C2)=CC=C2OC)=O	82
W308	OC(CCC1=NC(C2=CC=CC=C2)=C(C3=CC=CC=C3)O1)=O	O=C(C=S(C)(C)=O)C1=CC=C(C(F)(F)F)C=C1	O=C(C1=CC=C(C(F)(F)F)C=C1)COC(CCC2=NC(C3=CC=CC=C3)=C(O2)C4=CC=CC=C4)=O	87
W309	BrC1=CC=C(O1)C(=O)O	O=C(C=S(C)(C)=O)C1=CC=C(C(F)(F)F)C=C1	O=C(C1=CC=C(C(F)(F)F)C=C1)COC(C(O2)=CC=C2Br)=O	90
W310	BrC1=CC(=NC=C1)C(=O)O	O=C(C=S(C)(C)=O)C1=CC=C(C(F)(F)F)C=C1	O=C(C1=CC=C(C(F)(F)F)C=C1)COC(C2=NC=CC(Br)=C2)=O	60
W311	ClC1=CC=CC(=N1)C(=O)O	O=C(C=S(C)(C)=O)C1=CC=C(C(F)(F)F)C=C1	O=C(C1=CC=C(C(F)(F)F)C=C1)COC(C2=NC(Cl)=CC=C2)=O	90
W312	N1=CC(=CC(=C1)C(=O)O)C(=O)O	O=C(C=S(C)(C)=O)C1=CC=C(C(F)(F)F)C=C1	O=C(C1=CC=C(C(F)(F)F)C=C1)COC(C2=CN=CC(C(OCC(C3=CC=C(C(F)(F)F)C=C3)=O)=O)=C2)=O	7
W313	C(C1=CC=2OCOC2C=C1)(=O)O	O=C(C=S(C)(C)=O)C1=CC=C(C(F)(F)F)C=C1	O=C(C1=CC=C(C(F)(F)F)C=C1)COC(C2=CC3=C(C=C2)OCO3)=O	93
W314	OC(CCC1=NC=CC=C1)=O	O=C(C=S(C)(C)=O)C1=CC=C(C(F)(F)F)C=C1	O=C(C1=CC=C(C(F)(F)F)C=C1)COC(CCC2=NC=CC=C2)=O	60
W315	NC1=CN=C(C=C1C(=O)O)OC	O=C(C=S(C)(C)=O)C1=CC=C(C(F)(F)F)C=C1	O=C(C1=CC=C(C(F)(F)F)C=C1)COC(C2=CC(OC)=NC=C2N)=O	3
W316	BrC1=CC=C(S1)C(=O)O	O=C(C=S(C)(C)=O)C1=CC=C(C(F)(F)F)C=C1	O=C(C1=CC=C(C(F)(F)F)C=C1)COC(C(S2)=CC=C2Br)=O	95
W317	BrC1=NC=CC(=C1)C(=O)O	O=C(C=S(C)(C)=O)C1=CC=C(C(F)(F)F)C=C1	O=C(C1=CC=C(C(F)(F)F)C=C1)COC(C2=CC(Br)=NC=C2)=O	88
W318	CC1=NC=C(C(=O)O)C=C1	O=C(C=S(C)(C)=O)C1=CC=C(C(F)(F)F)C=C1	O=C(C1=CC=C(C(F)(F)F)C=C1)COC(C(C=C2)=CN=C2C)=O	91
W319	CC1=CC=CC(=N1)C(=O)O	O=C(C=S(C)(C)=O)C1=CC=C(C(F)(F)F)C=C1	O=C(C1=CC=C(C(F)(F)F)C=C1)COC(C2=NC(C)=CC=C2)=O	90
W320	BrC1=C(C(=O)O)C=CC=N1	O=C(C=S(C)(C)=O)C1=CC=C(C(F)(F)F)C=C1	O=C(C1=CC=C(C(F)(F)F)C=C1)COC(C(C=CC=N2)=C2Br)=O	73
W321	FC(C1=NC=C(C(=O)O)C=C1)(F)F	O=C(C=S(C)(C)=O)C1=CC=C(C(F)(F)F)C=C1	O=C(C1=CC=C(C(F)(F)F)C=C1)COC(C(C=C2)=CN=C2C(F)(F)F)=O	89
W322	FC=1C=CC(=NC1)C(=O)O	O=C(C=S(C)(C)=O)C1=CC=C(C(F)(F)F)C=C1	O=C(C1=CC=C(C(F)(F)F)C=C1)COC(C2=NC=C(C=C2)F)=O	89
W323	C(C1=CC=CC=C1)(=S)O	O=C(C=S(C)(C)=O)C1=CC=C(C(F)(F)F)C=C1	O=C(C1=CC=C(C(F)(F)F)C=C1)COC(C2=CC=CC=C2)=S	46
W324	C(C=C)(=O)O	O=C(C=S(C)(C)=O)C1=CC=C(C(F)(F)F)C=C1	O=C(C1=CC=C(C(F)(F)F)C=C1)COC(C=C)=O	31
W325	C1(CCC1)C(=O)O	O=C(C=S(C)(C)=O)C1=CC=C(C(F)(F)F)C=C1	O=C(C1=CC=C(C(F)(F)F)C=C1)COC(C2CCC2)=O	82
W326	C1(CC1)CC(=O)O	O=C(C=S(C)(C)=O)C1=CC=C(C(F)(F)F)C=C1	O=C(C1=CC=C(C(F)(F)F)C=C1)COC(CC2CC2)=O	44
W327	CC(CCC(=O)O)C	O=C(C=S(C)(C)=O)C1=CC=C(C(F)(F)F)C=C1	O=C(C1=CC=C(C(F)(F)F)C=C1)COC(CCC(C)C)=O	58
W328	OC(CC[C@@H](C)[C@@H]1[C@]2(C)[C@](CC1)([H])[C@]3([H])CC[C@]4([H])C[C@H](O)CC[C@]4(C)[C@@]3([H])CC2)=O	O=C(C=S(C)(C)=O)C1=CC=C(C(F)(F)F)C=C1	O=C(C1=CC=C(C(F)(F)F)C=C1)COC(CC[C@H]([C@@H]2[C@@]3([C@]([H])([C@@]4(CC[C@@]5(C[C@@H](CC[C@@]5([C@]4(CC3)[H])C)O)[H])[H])CC2)C)C)=O	56
W329	C(CCCCC=C)(=O)O	O=C(C=S(C)(C)=O)C1=CC=C(C(F)(F)F)C=C1	O=C(C1=CC=C(C(F)(F)F)C=C1)COC(CCCCC=C)=O	65
W330	C(CCCCCCC\C=C/CCCCCCCC)(=O)O	O=C(C=S(C)(C)=O)C1=CC=C(C(F)(F)F)C=C1	O=C(C1=CC=C(C(F)(F)F)C=C1)COC(CCCCCCC/C=C\CCCCCCCC)=O	63
W331	FC(C(C(C(=O)O)(F)F)(F)F)(F)F	O=C(C=S(C)(C)=O)C1=CC=C(C(F)(F)F)C=C1	O=C(C1=CC=C(C(F)(F)F)C=C1)COC(C(F)(F)C(F)(F)C(F)(F)F)=O	2
W332	OC(CCC(C1=CC=C(C2=CC=CC=C2)C=C1)=O)=O	O=C(C=S(C)(C)=O)C1=CC=C(C(F)(F)F)C=C1	O=C(C1=CC=C(C(F)(F)F)C=C1)COC(CCC(C2=CC=C(C=C2)C3=CC=CC=C3)=O)=O	83
W333	OC([C@H](C(C)C)N(C(CCCC)=O)CC(C=C1)=CC=C1C2=CC=CC=C2C3=NNN=N3)=O	O=C(C=S(C)(C)=O)C1=CC=C(C)C=C1	O=C(C1=CC=C(C)C=C1)COC([C@@H](N(CC2=CC=C(C3=CC=CC=C3C4=NNN=N4)C=C2)C(CCCC)=O)C(C)C)=O	13
W334	C(C(C)C)(=O)O	O=C(C=S(C)(C)=O)C1=CC=C(C)C=C1	O=C(C1=CC=C(C)C=C1)COC(C(C)C)=O	95
W335	O1CCC(CC1)C(=O)O	O=C(C=S(C)(C)=O)C1=CC=C(C)C=C1	O=C(C1=CC=C(C)C=C1)COC(C2CCOCC2)=O	93
W336	COC(=O)[C@@H]1CC[C@H](CC1)C(=O)O	O=C(C=S(C)(C)=O)C1=CC=C(C)C=C1	O=C(C1=CC=C(C)C=C1)COC([C@@H](CC2)CC[C@H]2C(OC)=O)=O	90
W337	C(=O)(OCC1=CC=CC=C1)N1CCC(CC1)C(=O)O	O=C(C=S(C)(C)=O)C1=CC=C(C)C=C1	O=C(C1=CC=C(C)C=C1)COC(C(CC2)CCN2C(OCC3=CC=CC=C3)=O)=O	90
W338	C1(=CC=C2C=CC3=CC=CC4=CC=C1C2=C34)CCCC(=O)O	O=C(C=S(C)(C)=O)C1=CC=C(C)C=C1	O=C(C1=CC=C(C)C=C1)COC(CCCC2=CC=C3C=CC4=CC=CC5=CC=C2C3=C45)=O	91
W339	O=C1N(C(C2=CC=CC=C12)=O)[C@H](C(=O)O)C	O=C(C=S(C)(C)=O)C1=CC=C(C)C=C1	O=C(C1=CC=C(C)C=C1)COC([C@H](C)N(C(C2=CC=CC=C32)=O)C3=O)=O	86
W340	C(CCCCCC)(=O)O	O=C(C=S(C)(C)=O)C1=CC=C(C)C=C1	O=C(C1=CC=C(C)C=C1)COC(CCCCCC)=O	86
W341	CC(C(=O)O)(CC)C	O=C(C=S(C)(C)=O)C1=CC=C(C)C=C1	O=C(C1=CC=C(C)C=C1)COC(C(CC)(C)C)=O	88
W342	C(C)C(C(=O)O)CCCC	O=C(C=S(C)(C)=O)C1=CC=C(C)C=C1	O=C(C1=CC=C(C)C=C1)COC(C(CCCC)CC)=O	83
W343	C12C(CC(C=C1)C2)C(=O)O	O=C(C=S(C)(C)=O)C1=CC=C(C)C=C1	O=C(C1=CC=C(C)C=C1)COC(C2C3C=CC(C3)C2)=O	81
W344	C(CCC)(=O)O	O=C(C=S(C)(C)=O)C1=CC=C(C)C=C1	O=C(C1=CC=C(C)C=C1)COC(CCC)=O	87
W345	BrCCCCCCCCCCC(=O)O	O=C(C=S(C)(C)=O)C1=CC=C(C)C=C1	O=C(C1=CC=C(C)C=C1)COC(CCCCCCCCCCBr)=O	60
W346	ClCCC(=O)O	O=C(C=S(C)(C)=O)C1=CC=C(C)C=C1	O=C(C1=CC=C(C)C=C1)COC(CCCl)=O	46
W347	O=C(CCC(=O)O)C	O=C(C=S(C)(C)=O)C1=CC=C(C)C=C1	O=C(C1=CC=C(C)C=C1)COC(CCC(C)=O)=O	90
W348	COCC(=O)O	O=C(C=S(C)(C)=O)C1=CC=C(C)C=C1	O=C(C1=CC=C(C)C=C1)COC(COC)=O	85
W349	BrC=1C=CC(=C(C(=O)O)C1)C	O=C(C=S(C)(C)=O)C1=C(C=CC=C2)C2=CC=C1	O=C(C1=CC=CC2=C1C=CC=C2)COC(C3=C(C)C=CC(Br)=C3)=O	55
W350	BrC=1C=CC(=C(C(=O)O)C1)F	O=C(C=S(C)(C)=O)C1=C(C=CC=C2)C2=CC=C1	O=C(C1=CC=CC2=C1C=CC=C2)COC(C3=C(F)C=CC(Br)=C3)=O	59
W351	COC=1C=C(C(=O)O)C=CC1	O=C(C=S(C)(C)=O)C1=C(C=CC=C2)C2=CC=C1	O=C(C1=CC=CC2=C1C=CC=C2)COC(C3=CC=CC(OC)=C3)=O	51
W352	FC1=C(C(=O)O)C=C(C=C1)C	O=C(C=S(C)(C)=O)C1=C(C=CC=C2)C2=CC=C1	O=C(C1=CC=CC2=C1C=CC=C2)COC(C3=C(F)C=CC(C)=C3)=O	57
W353	CC(C1=CC=CC=C1)C(=O)O	O=C(C=S(C)(C)=O)C1=C(C=CC=C2)C2=CC=C1	O=C(C1=CC=CC2=C1C=CC=C2)COC(C(C3=CC=CC=C3)C)=O	55
W354	C(C1=CC=CC=C1)(=O)O	O=C(C=S(C)(C)=O)C1=C(C=CC=C2)C2=CC=C1	O=C(C1=CC=CC2=C1C=CC=C2)COC(C3=CC=CC=C3)=O	56
W355	C(CCC)C1=CC=C(C(=O)O)C=C1	O=C(C=S(C)(C)=O)C1=C(C=CC=C2)C2=CC=C1	O=C(C1=CC=CC2=C1C=CC=C2)COC(C3=CC=C(CCCC)C=C3)=O	58
W356	C(C)C1=C(C(=O)O)C=CC=C1	O=C(C=S(C)(C)=O)C1=C(C=CC=C2)C2=CC=C1	O=C(C1=CC=CC2=C1C=CC=C2)COC(C3=CC=CC=C3CC)=O	58
W357	O=C1N(C(C2=CC=CC=C12)=O)[C@H](C(=O)O)C	O=C(C=S(C)(C)=O)C1=C(C=CC=C2)C2=CC=C1	O=C(C1=CC=CC2=C1C=CC=C2)COC([C@H](C)N(C(C3=CC=CC=C43)=O)C4=O)=O	63
W358	C(CCCCCC)(=O)O	O=C(C=S(C)(C)=O)C1=C(C=CC=C2)C2=CC=C1	O=C(C1=CC=CC2=C1C=CC=C2)COC(CCCCCC)=O	40
W359	CC(C(=O)O)(CC)C	O=C(C=S(C)(C)=O)C1=C(C=CC=C2)C2=CC=C1	O=C(C1=CC=CC2=C1C=CC=C2)COC(C(CC)(C)C)=O	45
W360	C(C)C(C(=O)O)CCCC	O=C(C=S(C)(C)=O)C1=C(C=CC=C2)C2=CC=C1	O=C(C1=CC=CC2=C1C=CC=C2)COC(C(CCCC)CC)=O	43
W361	C12C(CC(C=C1)C2)C(=O)O	O=C(C=S(C)(C)=O)C1=C(C=CC=C2)C2=CC=C1	O=C(C1=CC=CC2=C1C=CC=C2)COC(C3C4C=CC(C4)C3)=O	42
W362	C(CCC)(=O)O	O=C(C=S(C)(C)=O)C1=C(C=CC=C2)C2=CC=C1	O=C(C1=CC=CC2=C1C=CC=C2)COC(CCC)=O	49
W363	BrCCCCCCCCCCC(=O)O	O=C(C=S(C)(C)=O)C1=C(C=CC=C2)C2=CC=C1	O=C(C1=CC=CC2=C1C=CC=C2)COC(CCCCCCCCCCBr)=O	40
W364	ClCCC(=O)O	O=C(C=S(C)(C)=O)C1=C(C=CC=C2)C2=CC=C1	O=C(C1=CC=CC2=C1C=CC=C2)COC(CCCl)=O	25
W365	BrC=1C=CC(=C(C(=O)O)C1)C	O=C(C=S(C)(C)=O)C1=CC(C)=CC=C1	O=C(C1=CC=CC(C)=C1)COC(C2=C(C)C=CC(Br)=C2)=O	77
W366	BrC=1C=CC(=C(C(=O)O)C1)F	O=C(C=S(C)(C)=O)C1=CC(C)=CC=C1	O=C(C1=CC=CC(C)=C1)COC(C2=C(F)C=CC(Br)=C2)=O	81
W367	COC=1C=C(C(=O)O)C=CC1	O=C(C=S(C)(C)=O)C1=CC(C)=CC=C1	O=C(C1=CC=CC(C)=C1)COC(C2=CC(OC)=CC=C2)=O	82
W368	FC1=C(C(=O)O)C=C(C=C1)C	O=C(C=S(C)(C)=O)C1=CC(C)=CC=C1	O=C(C1=CC=CC(C)=C1)COC(C2=CC(C)=CC=C2F)=O	87
W369	CC(C1=CC=CC=C1)C(=O)O	O=C(C=S(C)(C)=O)C1=CC(C)=CC=C1	O=C(C1=CC=CC(C)=C1)COC(C(C2=CC=CC=C2)C)=O	77
W370	C(C1=CC=CC=C1)(=O)O	O=C(C=S(C)(C)=O)C1=CC(C)=CC=C1	O=C(C1=CC=CC(C)=C1)COC(C2=CC=CC=C2)=O	84
W371	C(CCC)C1=CC=C(C(=O)O)C=C1	O=C(C=S(C)(C)=O)C1=CC(C)=CC=C1	O=C(C1=CC=CC(C)=C1)COC(C2=CC=C(CCCC)C=C2)=O	73
W372	C(C)C1=C(C(=O)O)C=CC=C1	O=C(C=S(C)(C)=O)C1=CC(C)=CC=C1	O=C(C1=CC=CC(C)=C1)COC(C2=CC=CC=C2CC)=O	84
W373	O=C1N(C(C2=CC=CC=C12)=O)[C@H](C(=O)O)C	O=C(C=S(C)(C)=O)C1=CC(C)=CC=C1	O=C(C1=CC=CC(C)=C1)COC([C@H](C)N(C(C2=CC=CC=C32)=O)C3=O)=O	84
W374	C(CCCCCC)(=O)O	O=C(C=S(C)(C)=O)C1=CC(C)=CC=C1	O=C(C1=CC=CC(C)=C1)COC(CCCCCC)=O	68
W375	CC(C(=O)O)(CC)C	O=C(C=S(C)(C)=O)C1=CC(C)=CC=C1	O=C(C1=CC=CC(C)=C1)COC(C(CC)(C)C)=O	63
W376	C(C)C(C(=O)O)CCCC	O=C(C=S(C)(C)=O)C1=CC(C)=CC=C1	O=C(C1=CC=CC(C)=C1)COC(C(CCCC)CC)=O	65
W377	C12C(CC(C=C1)C2)C(=O)O	O=C(C=S(C)(C)=O)C1=CC(C)=CC=C1	O=C(C1=CC=CC(C)=C1)COC(C2C3C=CC(C3)C2)=O	57
W378	C(CCC)(=O)O	O=C(C=S(C)(C)=O)C1=CC(C)=CC=C1	O=C(C1=CC=CC(C)=C1)COC(CCC)=O	72
W379	BrCCCCCCCCCCC(=O)O	O=C(C=S(C)(C)=O)C1=CC(C)=CC=C1	O=C(C1=CC=CC(C)=C1)COC(CCCCCCCCCCBr)=O	46
W380	ClCCC(=O)O	O=C(C=S(C)(C)=O)C1=CC(C)=CC=C1	O=C(C1=CC=CC(C)=C1)COC(CCCl)=O	37
W381	BrC=1C=CC(=C(C(=O)O)C1)C	O=C(C=S(C)(C)=O)OC(C)C	O=C(OC(C)C)COC(C1=C(C)C=CC(Br)=C1)=O	76
W382	BrC=1C=CC(=C(C(=O)O)C1)F	O=C(C=S(C)(C)=O)OC(C)C	O=C(OC(C)C)COC(C1=C(F)C=CC(Br)=C1)=O	81
W383	COC=1C=C(C(=O)O)C=CC1	O=C(C=S(C)(C)=O)OC(C)C	O=C(OC(C)C)COC(C1=CC(OC)=CC=C1)=O	71
W384	FC1=C(C(=O)O)C=C(C=C1)C	O=C(C=S(C)(C)=O)OC(C)C	O=C(OC(C)C)COC(C(C=C(C)C=C1)=C1F)=O	79
W385	CC(C1=CC=CC=C1)C(=O)O	O=C(C=S(C)(C)=O)OC(C)C	O=C(OC(C)C)COC(C(C1=CC=CC=C1)C)=O	45
W386	C(C1=CC=CC=C1)(=O)O	O=C(C=S(C)(C)=O)OC(C)C	O=C(OC(C)C)COC(C1=CC=CC=C1)=O	72
W387	C(CCC)C1=CC=C(C(=O)O)C=C1	O=C(C=S(C)(C)=O)OC(C)C	O=C(OC(C)C)COC(C1=CC=C(CCCC)C=C1)=O	63
W388	C(C)C1=C(C(=O)O)C=CC=C1	O=C(C=S(C)(C)=O)OC(C)C	O=C(OC(C)C)COC(C(C=CC=C1)=C1CC)=O	64
W389	O=C1N(C(C2=CC=CC=C12)=O)[C@H](C(=O)O)C	O=C(C=S(C)(C)=O)OC(C)C	O=C(OC(C)C)COC([C@@H](C)N(C(C1=CC=CC=C21)=O)C2=O)=O	80
W390	C(CCCCCC)(=O)O	O=C(C=S(C)(C)=O)OC(C)C	O=C(OC(C)C)COC(CCCCCC)=O	41
W391	CC(C(=O)O)(CC)C	O=C(C=S(C)(C)=O)OC(C)C	O=C(OC(C)C)COC(C(CC)(C)C)=O	33
W392	C(C)C(C(=O)O)CCCC	O=C(C=S(C)(C)=O)OC(C)C	O=C(OC(C)C)COC(C(CCCC)CC)=O	36
W393	C12C(CC(C=C1)C2)C(=O)O	O=C(C=S(C)(C)=O)OC(C)C	O=C(OC(C)C)COC(C1C2C=CC(C2)C1)=O	45
W394	C(CCC)(=O)O	O=C(C=S(C)(C)=O)OC(C)C	O=C(OC(C)C)COC(CCC)=O	43
W395	BrCCCCCCCCCCC(=O)O	O=C(C=S(C)(C)=O)OC(C)C	O=C(OC(C)C)COC(CCCCCCCCCCBr)=O	66
W396	ClCCC(=O)O	O=C(C=S(C)(C)=O)OC(C)C	O=C(OC(C)C)COC(CCCl)=O	32
W397	BrC=1C=CC(=C(C(=O)O)C1)C	O=C(C=S(C)(C)=O)C1=CC=C(C2=CC=CC=C2)C=C1	O=C(C1=CC=C(C2=CC=CC=C2)C=C1)COC(C3=C(C)C=CC(Br)=C3)=O	83
W398	BrC=1C=CC(=C(C(=O)O)C1)F	O=C(C=S(C)(C)=O)C1=CC=C(C2=CC=CC=C2)C=C1	O=C(C1=CC=C(C2=CC=CC=C2)C=C1)COC(C3=C(F)C=CC(Br)=C3)=O	78
W399	COC=1C=C(C(=O)O)C=CC1	O=C(C=S(C)(C)=O)C1=CC=C(C2=CC=CC=C2)C=C1	O=C(C1=CC=C(C2=CC=CC=C2)C=C1)COC(C3=CC(OC)=CC=C3)=O	76
W400	FC1=C(C(=O)O)C=C(C=C1)C	O=C(C=S(C)(C)=O)C1=CC=C(C2=CC=CC=C2)C=C1	O=C(C1=CC=C(C2=CC=CC=C2)C=C1)COC(C(C=C(C)C=C3)=C3F)=O	80
W401	CC(C1=CC=CC=C1)C(=O)O	O=C(C=S(C)(C)=O)C1=CC=C(C2=CC=CC=C2)C=C1	O=C(C1=CC=C(C2=CC=CC=C2)C=C1)COC(C(C3=CC=CC=C3)C)=O	79
W402	C(C1=CC=CC=C1)(=O)O	O=C(C=S(C)(C)=O)C1=CC=C(C2=CC=CC=C2)C=C1	O=C(C1=CC=C(C2=CC=CC=C2)C=C1)COC(C3=CC=CC=C3)=O	81
W403	C(CCC)C1=CC=C(C(=O)O)C=C1	O=C(C=S(C)(C)=O)C1=CC=C(C2=CC=CC=C2)C=C1	O=C(C1=CC=C(C2=CC=CC=C2)C=C1)COC(C(C=C3)=CC=C3CCCC)=O	75
W404	C(C)C1=C(C(=O)O)C=CC=C1	O=C(C=S(C)(C)=O)C1=CC=C(C2=CC=CC=C2)C=C1	O=C(C1=CC=C(C2=CC=CC=C2)C=C1)COC(C(C=CC=C3)=C3CC)=O	81
W405	O=C1N(C(C2=CC=CC=C12)=O)[C@H](C(=O)O)C	O=C(C=S(C)(C)=O)C1=CC=C(C2=CC=CC=C2)C=C1	O=C(C1=CC=C(C2=CC=CC=C2)C=C1)COC([C@H](C)N(C(C3=CC=CC=C43)=O)C4=O)=O	85
W406	C(CCCCCC)(=O)O	O=C(C=S(C)(C)=O)C1=CC=C(C2=CC=CC=C2)C=C1	O=C(C1=CC=C(C2=CC=CC=C2)C=C1)COC(CCCCCC)=O	49
W407	CC(C(=O)O)(CC)C	O=C(C=S(C)(C)=O)C1=CC=C(C2=CC=CC=C2)C=C1	O=C(C1=CC=C(C2=CC=CC=C2)C=C1)COC(C(CC)(C)C)=O	54
W408	C(C)C(C(=O)O)CCCC	O=C(C=S(C)(C)=O)C1=CC=C(C2=CC=CC=C2)C=C1	O=C(C1=CC=C(C2=CC=CC=C2)C=C1)COC(C(CCCC)CC)=O	52
W409	C12C(CC(C=C1)C2)C(=O)O	O=C(C=S(C)(C)=O)C1=CC=C(C2=CC=CC=C2)C=C1	O=C(C1=CC=C(C2=CC=CC=C2)C=C1)COC(C3C4C=CC(C4)C3)=O	40
W410	C(CCC)(=O)O	O=C(C=S(C)(C)=O)C1=CC=C(C2=CC=CC=C2)C=C1	O=C(C1=CC=C(C2=CC=CC=C2)C=C1)COC(CCC)=O	58
W411	BrCCCCCCCCCCC(=O)O	O=C(C=S(C)(C)=O)C1=CC=C(C2=CC=CC=C2)C=C1	O=C(C1=CC=C(C2=CC=CC=C2)C=C1)COC(CCCCCCCCCCBr)=O	59
W412	ClCCC(=O)O	O=C(C=S(C)(C)=O)C1=CC=C(C2=CC=CC=C2)C=C1	O=C(C1=CC=C(C2=CC=CC=C2)C=C1)COC(CCCl)=O	40
